1 **Inositol pyrophosphate profiling reveals regulatory roles of IP6K2-dependent**  
2 **enhanced IP<sub>7</sub> metabolism in enteric nervous system**

3

4 Masatoshi Ito<sup>1,\*</sup>, Natsuko Fujii<sup>2</sup>, Saori Kohara<sup>2</sup>, Shuho Hori<sup>1</sup>, Masayuki Tanaka<sup>1</sup>,  
5 Christopher Wittwer<sup>7</sup>, Kenta Kikuchi<sup>6</sup>, Takatoshi Iijima<sup>3</sup>, Yu Kakimoto<sup>4</sup>, Kenichi  
6 Hirabayashi<sup>5</sup>, Daisuke Kurotaki<sup>6</sup>, Henning J. Jessen<sup>7</sup>, Adolfo Saiardi<sup>8</sup>, Eiichiro Nagata<sup>2,\*</sup>

7

8 <sup>1</sup>Support Center for Medical Research and Education, Tokai University, 143  
9 Shimokasuya, Isehara, Kanagawa 259-1193, Japan

10 <sup>2</sup>Department of Neurology, Tokai University School of Medicine, 143 Shimokasuya,  
11 Isehara, Kanagawa 259-1193, Japan

12 <sup>3</sup>Department of Molecular Life Science, Tokai University School of Medicine, 143  
13 Shimokasuya, Isehara, Kanagawa 259-1193, Japan

14 <sup>4</sup>Department of Forensic Medicine, Tokai University School of Medicine, 143  
15 Shimokasuya, Isehara, Kanagawa 259-1193, Japan

16 <sup>5</sup>Department of Pathology, Tokai University School of Medicine, 143 Shimokasuya,  
17 Isehara, Kanagawa 259-1193, Japan

18 <sup>6</sup>Laboratory of Chromatin Organization in Immune Cell Development, International  
19 Research Center for Medical Sciences, Kumamoto University, 2-2-1 Honjo, Chuo-ku,  
20 Kumamoto, Kumamoto 860-0811, Japan

21 <sup>7</sup>Institute of Organic Chemistry, University of Freiburg, Albert str. 21, 79104, Freiburg,  
22 Germany

23 <sup>8</sup>Medical Research Council Laboratory for Molecular Cell Biology, University College  
24 London, WC1E 6BT, London, UK

25

26 \* Correspondence:

27 Eiichiro Nagata, M.D., Ph.D.

28 Department of Neurology, Tokai University School of Medicine, 143 Shimokasuya,

29 Isehara, Kanagawa 259-1193, Japan

30 TEL: +81-463-93-1121 (ext. 2242); FAX: +81-463-92-6299; e-mail:

31 [enagata@is.icc.u-tokai.ac.jp](mailto:enagata@is.icc.u-tokai.ac.jp)

32

33 Masatoshi Ito, Ph.D.

34 Support Center for Medical Research and Education, Tokai University, 143

35 Shimokasuya, Isehara, Kanagawa 259-1193, Japan

36 TEL: +81-463-93-1121 (ext. 2553); e-mail: [masa104-ito@tokai-u.jp](mailto:masa104-ito@tokai-u.jp)

37

38

39 **Abstract**

40 Inositol pyrophosphates (PP-IPs) regulate diverse physiological processes; to better  
41 understand their functional roles, assessing their tissue-specific distribution is important.  
42 Here, we profiled PP-IP levels in mammalian organs using a novel HILIC-MS/MS  
43 protocol and discovered that the gastrointestinal tract (GIT) contained the highest levels  
44 of IP<sub>7</sub> and its precursor IP<sub>6</sub>. Although their absolute levels in the GIT is diet-dependent,  
45 elevated IP<sub>7</sub> metabolism still exists under dietary regimes devoid of exogenous IP<sub>7</sub>. Of  
46 the major GIT cells, enteric neurons selectively express the IP<sub>7</sub>-synthesizing enzyme  
47 IP6K2. *IP6K2*-knockout mice exhibited significantly impaired IP<sub>7</sub> metabolism in the  
48 various organs including the proximal GIT. Additionally, HILIC-MS/MS analysis  
49 displayed that genetic ablation of *IP6K2* significantly impaired IP<sub>7</sub> metabolism in the  
50 gut and duodenal muscularis externa containing myenteric plexus. Whole transcriptome  
51 analysis of duodenal muscularis externa further suggested that IP6K2 inhibition induced  
52 the gene sets associated with mature neurons such as inhibitory, GABAergic and  
53 dopaminergic neurons, concomitantly with suppression of those for neural  
54 progenitor/stem cells and glial cells. In addition, IP6K2 inhibition explicitly affected  
55 transcript levels of certain genes modulating neuronal differentiation and functioning,  
56 implying critical roles of IP6K2-IP<sub>7</sub> axis in developmental and functional regulation of  
57 enteric nervous system. These results collectively reveal an unexpected role of  
58 mammalian IP<sub>7</sub>—a highly active IP6K2-IP<sub>7</sub> pathway is conducive to enteric nervous  
59 system.

60

61 **Keywords:** inositol pyrophosphate, diphosphoinositol pentakisphosphate, inositol  
62 hexakisphosphate kinase 2, hydrophilic interaction liquid chromatography-tandem mass

63 spectrometry, enteric nervous system

64

## 65 **Introduction**

66 Myo-inositol phosphates (IPs) are ubiquitously synthesized in all organisms and are  
67 involved in pleiotropic biological processes, most importantly in intracellular signaling  
68 (Irvine and Schell, 2001). Among the IP family, inositol hexakisphosphate (IP<sub>6</sub>) is the  
69 most abundant, and serves as a precursor of inositol pyrophosphates (PP-IPs) possessing  
70 diphosphate moieties at specific carbon positions (Saiardi, 2012; Wilson et al, 2013;  
71 Shears, 2015; Shah et al, 2017). Diphosphoinositol pentakisphosphate (IP<sub>7</sub>) and  
72 bisdiphosphoinositol tetrakisphosphate (IP<sub>8</sub>) are the most well-characterized PP-IPs in  
73 mammals and yeasts, and carry diphosphate moieties at the 5-position (5-IP<sub>7</sub>) and  
74 1,5-positions (1,5-IP<sub>8</sub>) of the inositol ring, respectively (Draskovic et al, 2008; Shears,  
75 2015). Recent studies using mammalian cells have demonstrated that PP-IPs regulate  
76 phosphate flux, energy homeostasis, and post-transcriptional processes at the molecular  
77 level (Wilson et al, 2019; Li et al, 2020; López-Sánchez et al, 2020; Sahu et al, 2020;  
78 Gu et al, 2021). In mammals, 5-IP<sub>7</sub> is synthesized by three inositol hexakisphosphate  
79 kinases (IP6Ks) IP6K1, IP6K2, and IP6K3. IP6K1 and IP6K2 are expressed in most  
80 mammalian tissues, with highest expression in the brain and testis, whereas IP6K3  
81 expression is mainly restricted to the muscles (Saiardi et al, 2001; Moritoh et al, 2016;  
82 Laha et al, 2021). *In vivo* studies using *IP6K1*- or *IP6K2*-knockout mice suggest that  
83 PP-IPs contribute to the development and maintenance of neuronal cells (Fu et al, 2017;  
84 Nagpal et al, 2018, 2021). In addition to these *in vivo* mice studies, our as well as other  
85 research groups have shown that PP-IPs are pathophysiologically involved in the  
86 progression of obesity (Chakraborty et al, 2010; Ghoshal et al, 2016), in cancer (Rao et  
87 al, 2015) and in neurodegenerative disorders such as Huntington's disease (Nagata et al,  
88 2011), amyotrophic lateral sclerosis (Nagata et al, 2016), and Alzheimer's disease

89 (Crocco et al, 2016). Therefore, PP-IPs are currently being considered as potential  
90 therapeutic targets for several diverse human disorders (Shears, 2016; Chakraborty,  
91 2018). However, we are unaware of any systematic studies that have directly and  
92 comprehensively analyzed PP-IP distribution in mammalian tissues, which could  
93 provide valuable insights into the effects of pharmacological interventions on the PP-IP  
94 system.

95 Over the past decade, extensive efforts have been made to develop analytical methods  
96 for detecting PP-IPs. Traditionally, PP-IPs have been studied using radioisotopic  
97  $^3\text{H}$ -inositol labeling coupled with anion exchange chromatography (Azevedo and  
98 Saiardi, 2006), which allows sensitive detection of metabolically labeled PP-IPs from  
99 cultured cells. Electrophoretic separation and colorimetric visualization of PP-IPs  
100 (Losito et al, 2009) have also become alternative standard methods for distinguishing  
101 PP-IPs. However, PP-IPs in mammalian tissues can neither be radioisotopically labelled,  
102 nor explicitly detected using colorimetric visualization. A mass spectrometric method  
103 coupled with capillary electrophoretic separation (capillary electrophoresis-mass  
104 spectrometry, CE-MS) (Qiu et al, 2020) was recently reported for sensitive analysis of  
105 PP-IPs in biological samples at the isomer level. However, the instrument setup  
106 involved is complex and requires skillful handling, and is therefore rarely available in  
107 research institutes.

108 We recently developed an analytical method that directly detects  
109 mammalian-derived  $\text{IP}_7$  and its precursor  $\text{IP}_6$  using conventional liquid  
110 chromatography-tandem mass spectrometry (LC-MS/MS) coupled with hydrophilic  
111 interaction liquid chromatography (HILIC) (Ito et al, 2018), enabling the previously  
112 impossible quantitation of PP-IPs in mammalian tissues. In this study, we analyzed

113 PP-IP and their precursor IP<sub>6</sub> levels in mammalian organs using a refined  
114 HILIC-MS/MS protocol. We found that IP<sub>7</sub> was present at explicit levels in the  
115 mammalian central nervous system (CNS), where IP6Ks are highly expressed.  
116 Surprisingly, we also discovered that the highest IP<sub>7</sub> production was observed in the  
117 gastrointestinal tract (GIT), even after depletion of dietary derived IP<sub>7</sub>. Of the major  
118 GIT cells, enteric neurons selectively expressed IP<sub>7</sub>-synthesizing enzyme IP6K2, which  
119 was revealed by assessment of single cell RNA-sequencing (scRNA-seq) data sets and  
120 confirmed by immunohistochemical detection. Our HILIC-MS/MS survey using  
121 *IP6K2*-knockout (*IP6K2*<sup>-/-</sup>) mice exhibited that IP6K2-dependent enhanced IP<sub>7</sub>  
122 metabolism exists in the gut and duodenal muscularis externa where myenteric plexus is  
123 located. We further performed whole transcriptome analysis of *IP6K2*-deficient and  
124 wild type (WT) duodenal muscularis externa to define a physiological role of IP6K2-IP<sub>7</sub>  
125 pathway in enteric nervous system (ENS).

126

127

128

129 **Results**

130 **Refinement of HILIC-MS/MS protocol for PP-IP analysis**

131 Before investigating PP-IP metabolism in mammalian tissues, we improved our  
132 HILIC-MS/MS analysis protocol for unequivocal detection and more precise  
133 quantitation of PP-IPs. Medronic acid compatible with LC-MS analysis significantly  
134 improves the chromatographic peak shape of phosphorylated compounds (Hsiao et al,  
135 2018). We employed a form of this solvent additive that has been optimized for HILIC  
136 analysis (InfinityLab deactivator additive, Agilent Technologies) and found that using it  
137 significantly improved the peak shapes of IP<sub>6</sub> and IP<sub>7</sub> (Fig. 1A), whereas without the  
138 additive, remarkably poor IP<sub>6</sub> and IP<sub>7</sub> peak shapes were obtained, probably due to the  
139 cumulative adsorption of cationic contaminants on the column derivative (amino group).  
140 Chromatographic peaks of IP<sub>7</sub> levels as low as 10 pmol were discernible using this  
141 additive (Fig. 1B). Direct use of LC-MS grade medronic acid resulted in similar  
142 beneficial effects on IP<sub>6</sub> and IP<sub>7</sub> peaks (Fig. S1), but the background noise was  
143 relatively higher than that for the InfinityLab deactivator additive. Thus, the additive  
144 was used in all our subsequent analyses.

145 To quantitate IP<sub>8</sub> (Fig. 1C) simultaneously with IP<sub>6</sub> and IP<sub>7</sub>, we assessed the mass  
146 spectra of IP<sub>8</sub> fragment ions obtained by collision-induced dissociation of the synthetic  
147 IP<sub>8</sub> standard (Fig. 1D). A series of fragment ions representing the losses of phosphate  
148 (80 Da) and water (18 Da) appeared in the spectra. Based on this result, we assigned  
149 each IP<sub>8</sub> fragment and optimized the selected reaction monitoring (SRM) conditions  
150 (Table S1). Using chemical standards of PP-IPs and their precursor IP<sub>6</sub>, we observed  
151 chromatographic peaks of IP<sub>6</sub>, IP<sub>7</sub>, and IP<sub>8</sub> at regular intervals of 0.2 min (Fig. 1E). To  
152 benchmark this method for the detection of endogenous PP-IPs, we treated HCT116



153 cells with NaF, which is known to increase IP<sub>7</sub> level (Menniti et al, 1993). While a clear  
154 IP<sub>6</sub> SRM peak and subtle IP<sub>7</sub> and IP<sub>8</sub> SRM peaks were observed for untreated HCT116  
155 cells, explicit IP<sub>7</sub> and IP<sub>8</sub> SRM peaks were detected for NaF-treated cells (Fig. 1F). We  
156 also observed a dose-dependent reduction in IP<sub>7</sub> level and the IP<sub>7</sub>/IP<sub>6</sub> ratio in HCT116  
157 cells treated with the IP6K inhibitor TNP (Fig. S2). Thus, our refined HILIC-MS/MS  
158 protocol achieved robust, sensitive, and reliable detection of endogenous IP<sub>6</sub>, IP<sub>7</sub>, and  
159 IP<sub>8</sub> in biological samples.

160

### 161 **The mammalian gastrointestinal tract (GIT) contains high levels of PP-IPs**

162 Using the newly developed HILIC-MS/MS protocol, we investigated the distribution  
163 of PP-IPs in experimental model rodents fed with a standard plant-based diet (CE-2;  
164 Clea, Japan). Fifteen organs, including the CNS and GIT, were harvested from standard  
165 diet-fed C57BL/6J male mice. Surprisingly, HILIC-MS/MS analysis showed that the  
166 GIT had the highest levels of IP<sub>6</sub> and IP<sub>7</sub>, even after extensive rinsing of the organs with  
167 phosphate-buffered saline (PBS) to wash out the digested contents (Fig. 2A, B and  
168 Table S2). Importantly, the IP<sub>7</sub>/IP<sub>6</sub> ratio in the GIT was remarkably high, by far the  
169 highest in all organs examined (Fig. 2C and Table S2). A subtle IP<sub>8</sub> SRM peak was  
170 detected in stomach and small intestine samples, wherein IP<sub>7</sub> was abundant (Fig. 2D)  
171 but was not detected in other organs. While IP<sub>7</sub> SRM peaks were clearly detected in  
172 CNS samples (Fig. 2E), IP<sub>7</sub> levels in the CNS were modest compared with those in the  
173 GIT. Moreover, the IP<sub>7</sub>/IP<sub>6</sub> ratio in the spinal cord appeared to be higher than that in the  
174 cerebrum (Fig. 2C).

175 Several reports have shown that IPs (mainly IP<sub>6</sub>, known as phytic acid) are present in  
176 a variety of crop seeds (Dorsch et al, 2003; Liu et al, 2009; Kolozsvari et al, 2015;

177 Duong et al, 2017); moreover, plants also generate PP-IPs, which are crucial for  
178 phosphorus-starvation responses (Dong et al, 2019; Ried et al, 2021; Riemer et al, 2021).  
179 Therefore, we assumed that the plant-based CE-2 diet contains IP<sub>6</sub> and PP-IPs, and  
180 explicit chromatographic peaks of IP<sub>6</sub>, IP<sub>7</sub>, and IP<sub>8</sub> were observed in CE-2 samples (Fig.  
181 2F, upper panels). The concentrations of IP<sub>6</sub> and IP<sub>7</sub> in CE-2 were  $3.96 \pm 0.82$  nmol/mg  
182 and  $0.17 \pm 0.03$  nmol/mg, respectively. We next investigated their concentrations in  
183 purified diets with minimal levels of plant-derived components (Fig. 2F, middle and  
184 lower panels). The two purified diets examined (iVid-neo and 70% casein) contained  
185 low amounts of IP<sub>6</sub> and negligible amounts of IP<sub>7</sub> and IP<sub>8</sub>. Quantitative analysis  
186 revealed that the levels of all PP-IPs in both purified diets were less than 2% of those in  
187 CE-2 (Fig. 2G).

188 Since the IP<sub>7</sub>/IP<sub>6</sub> ratios in the stomach and duodenum were significantly higher than  
189 that in CE-2 (Fig. 2C), the high IP<sub>7</sub> level detected could not be attributed to its direct  
190 absorption from CE-2 diet, so it must have been endogenously produced by active IP6K  
191 enzyme. However, to exclude the possibility of selective intestinal absorption of IP<sub>7</sub>, we  
192 analyzed the feces of mice fed on CE-2 and estimated the loss of IP<sub>6</sub> and IP<sub>7</sub> in the  
193 digestive system (Fig. 2H). Similar to those for CE-2 samples, IP<sub>6</sub> and IP<sub>7</sub> SRM peaks  
194 were clearly observed in mouse feces samples. Quantitative analysis showed that  
195 approximately 50% of IP<sub>6</sub> and IP<sub>7</sub> in ingested food remained in the feces (Fig. 2I). Since  
196 the IP<sub>7</sub>/IP<sub>6</sub> ratio remained unchanged between undigested CE-2 and feces, we could  
197 exclude that IP<sub>7</sub> is selectively absorbed in the GIT, further demonstrating that the  
198 abundant IP<sub>7</sub> levels observed in the GIT must be endogenously generated by cellular  
199 metabolism.

200

201 **Enhanced IP<sub>7</sub> metabolism is retained in the proximal GIT of rodents under**  
202 **conditions of depleted dietary IP<sub>6</sub> and PP-IP supply**

203 To validate the presence of endogenously synthesized PP-IPs in the GIT, C57BL/6J  
204 mice were fed for 2 months on standard CE-2 diet; on iVid-neo containing negligible  
205 amounts of IP<sub>6</sub> and PP-IPs (Fig. 2E); or left fasting for 48 h (Fig. 3A). The GIT of both  
206 purified diet-fed and fasted mice showed a reduction in IP<sub>6</sub> and IP<sub>7</sub> levels compared  
207 with those of standard diet-fed mice; however, the levels were still close to (in the case  
208 of IP<sub>6</sub>) or far greater than (in the case of IP<sub>7</sub>) the CNS levels (Fig. 3B and C). IP<sub>8</sub> was  
209 not detected in any of the tested organs of purified diet-fed and fasted mice. The SRM  
210 chromatograms of both purified diet-fed and fasted mice samples had explicit IP<sub>7</sub> SRM  
211 peaks (Fig. 3D). Importantly, the stomach and duodenum of these mice showed  
212 prominently higher IP<sub>7</sub>/IP<sub>6</sub> ratio than those of their standard diet-fed counterparts (Fig.  
213 3E), implying further enhanced IP<sub>7</sub> metabolism compensated for the overall reduced IP<sub>7</sub>  
214 level. On the other hand, both purified diet-fed and fasted mice did not show any  
215 changes in the IP<sub>6</sub> and IP<sub>7</sub> levels as well as the IP<sub>7</sub>/IP<sub>6</sub> ratio in the CNS and testis  
216 compared with those of mice fed a standard diet. However, as with standard diet-fed  
217 mice, both purified diet-fed and fasted mice showed higher IP<sub>7</sub>/IP<sub>6</sub> ratios in the spinal  
218 cord than in the cerebrum. We also investigated IP<sub>7</sub> levels in the GIT of purified diet  
219 (70% casein)-fed Sprague–Dawley rats (Fig. 3F). Analogous to the results observed in  
220 the mouse model, both IP<sub>6</sub> and IP<sub>7</sub> levels in the GIT of these rats were drastically  
221 reduced compared with those in the standard diet-fed GIT and comparable to those in  
222 the CNS (Fig. 3G and H). In addition, the IP<sub>7</sub>/IP<sub>6</sub> ratio was higher in the stomach and  
223 duodenum of purified diet-fed rats compared with that of standard diet-fed rats (Fig. 3I),  
224 further demonstrating very active IP<sub>7</sub> metabolism in the mammalian proximal GIT.

225

226 **Enteric neurons highly express IP6K2 in the mammalian GIT**

227 To investigate the expression levels of the three IP6Ks in each GIT cell type, we used  
228 single-cell RNA sequencing (scRNA-seq) datasets and compared the expression levels  
229 of IP6Ks among GIT cell types. Quantitative analysis using a human embryonic  
230 intestinal cell scRNA-seq dataset (Fawkner-Corbett et al, 2021) showed that enteric  
231 neural cells expressed the highest levels of IP6K2 among different intestinal cells (Fig.  
232 4A, left panel). In enteric neural cells, IP6K2 was selectively expressed across enteric  
233 neuron subsets, such as motor neurons, interneurons, and neuroendocrine cells, but not  
234 in glial cells (Fig. 4A, right panel). This analysis was further supported by the IP6K  
235 quantitation using both E15.5 (Fig. S3A) and E18.5 (Fig. 4B) mouse embryonic ENS  
236 scRNA-seq datasets (Morarach et al, 2021). As in humans, IP6K2 isoform expression  
237 level in mouse enteric neurons was higher than in other neural cells such as neuroblasts,  
238 progenitors, glial cells, and Schwann cells. Moreover, the transcriptional analysis-based  
239 data were verified using immunohistochemical analyses. IP6K2 colocalized with the  
240 neuronal marker HuC/D in the mouse duodenal muscle layer, suggesting IP6K2 was  
241 expressed in the myenteric plexus (Fig. 4C). Other than enteric neurons, several cell  
242 types, including secretory progenitor cells, also expressed relatively high levels of  
243 IP6K2 (Fig. S3B). In addition, mouse enteric epithelial cell scRNA-seq data (Haber et  
244 al, 2017) showed that IP6K2 is expressed in mouse enteroendocrine cells (Fig. S3C).  
245 Expression levels of IP6K1 and IP6K3 in entire embryonic intestinal cells were low and  
246 negligible, respectively (Fig. 4A and B). These results suggest that IP6K2 is highly  
247 expressed in mammalian enteric neurons.

248

249 ***IP6K2*<sup>-/-</sup> mice show significant impairment of IP<sub>7</sub> metabolism in the proximal GIT**

250 To estimate the importance of IP6K2 in endogenous IP<sub>7</sub> synthesis in the mammalian  
251 organs including GIT, we employed a genetically modified mouse in which *IP6K2* exon  
252 6, encoding the kinase domain, was specifically deleted (Fig. 5A, upper panel) (Rao et  
253 al, 2014). To avoid any contamination of dietary-derived IPs in our analysis,  
254 *IP6K2*-knockout (*IP6K2*<sup>-/-</sup>) or wild type (WT) mice raised on the standard CE-2 diet  
255 were switched to a purified diet (iVid-neo) for one week, and then fasted for 48 h before  
256 sacrifice (Fig. 5A, lower panel). In WT mice, IP6K2 mRNA containing the exon 6  
257 sequence was expressed in the proximal GIT but only marginally compared with the  
258 expression in the CNS (Fig. 5B). As expected, the IP6K2 transcript was absent in  
259 *IP6K2*<sup>-/-</sup> mouse organs. We confirmed the loss of IP6K2 expression at the protein level  
260 using cerebrum lysate (Fig. 5C), because it has high IP6K2 protein expression and thus  
261 was useful for clearly validating the loss of IP6K2 in *IP6K2*<sup>-/-</sup> mice. HILIC-MS/MS  
262 analysis showed that *IP6K2*<sup>-/-</sup> mice had significantly lower levels of IP<sub>7</sub> in various  
263 organs, including the stomach and duodenum, compared with those in their WT  
264 counterparts, while IP<sub>6</sub> levels in each organ were almost the same between *IP6K2*<sup>-/-</sup> and  
265 WT mice (Fig. 5D and E). As previously observed (Fig. 3E and I), the IP<sub>7</sub>/IP<sub>6</sub> ratios in  
266 the stomach and duodenum of WT mice were much higher than those in the other  
267 organs examined (Fig. 5F). On the other hand, the IP<sub>7</sub>/IP<sub>6</sub> ratios in these two organs  
268 were significantly reduced in *IP6K2*<sup>-/-</sup> mice. The IP<sub>7</sub> SRM peaks for the *IP6K2*<sup>-/-</sup> mouse  
269 stomach and duodenum were also smaller compared with those of WT mice, while IP<sub>6</sub>  
270 levels were unchanged (Fig. 5G and H). Collectively, these data demonstrate that IP6K2  
271 is required for enhanced IP<sub>7</sub> metabolism in the mammalian proximal GIT.

272

273 **IP6K2-dependent enhanced IP<sub>7</sub> metabolism exists in the gut and duodenal**  
274 **muscularis externa where the myenteric plexus is located**

275 Since IP<sub>7</sub>-synthesizing kinase IP6K2 is selectively expressed in enteric neurons (Fig.  
276 4), we next sought to investigate IP<sub>7</sub> metabolism in the mammalian ENS. To this end,  
277 we collected the stomach and the consecutive 5 cm segments of duodenum, jejunum,  
278 and ileum from standard diet-fed or fasted mice. Some of these organs collected were  
279 subsequently used to isolate the muscularis externa where the myenteric plexus is  
280 located. These total GIT tissues and their muscularis externa were subjected to  
281 HILIC-MS/MS analysis to compare their IP<sub>7</sub> metabolism (Fig. 6A). Similar to the  
282 results shown in Fig. 3, 48 h fasting of mice rendered drastic reduction of IP<sub>6</sub> and IP<sub>7</sub>  
283 levels with concomitant increase of IP<sub>7</sub>/IP<sub>6</sub> ratio in total GIT tissues (Fig. 6B-D).  
284 Although the muscularis externa contained less IP<sub>6</sub> and IP<sub>7</sub> than total GIT tissues, the  
285 muscle layer exhibited a higher IP<sub>7</sub>/IP<sub>6</sub> ratio than total GIT tissues, which was less  
286 dependent on dietary conditions. IP<sub>7</sub>/IP<sub>6</sub> ratio of the duodenal muscularis externa was  
287 highest among the corresponding muscle layers of the neighboring GITs, implying  
288 highly active IP<sub>7</sub> metabolism in the duodenal ENS. To verify the relationship between  
289 IP6K2-IP<sub>7</sub> axis and ENS, we first attempted to visualize the duodenal myenteric plexus  
290 of *IP6K2*<sup>-/-</sup> mice by whole mount immunostaining (Fig. 6E). We found that *IP6K2*  
291 deletion largely affected neither the morphological features nor the neuronal cell density  
292 in the duodenal myenteric plexus (Fig. 6F). We next prepared the muscularis externa  
293 from the stomach to the ileum of WT and *IP6K2*<sup>-/-</sup> mice, first depleting dietary IP<sub>7</sub> in the  
294 GIT by 48 h fasting and performed HILIC-MS/MS analysis to evaluate IP<sub>7</sub> metabolism  
295 in the ENS of *IP6K2*<sup>-/-</sup> proximal GITs (Fig. 6G). While IP<sub>6</sub> levels in the muscularis  
296 externa were almost equivalent between WT and *IP6K2*<sup>-/-</sup> mice, IP<sub>7</sub> levels and IP<sub>7</sub>/IP<sub>6</sub>

297 ratios were significantly reduced in the gut and duodenal muscularis externa of *IP6K2*<sup>-/-</sup>  
298 mice (Fig. 6H-J). These results suggest that IP6K2 actively produces IP<sub>7</sub> in the gut and  
299 duodenal muscularis externa where enteric neurons are concentrated.

300

301 **The IP6K2-IP<sub>7</sub> axis is crucial for certain neurotranscriptome profiles associated**  
302 **with ENS development and functioning**

303 Considering the active IP6K2-IP<sub>7</sub> axis in the ENS, we assumed that alteration of IP<sub>7</sub>  
304 metabolism by *IP6K2* deletion might affect neuronal status in the proximal GIT. Thus,  
305 we randomly selected two neuronal genes expressed in the GIT as well as the CNS  
306 (Gremel et al, 2015), namely *dopamine receptor D5 (Drd5)*, and *cholecystokinin B*  
307 *receptor (Cckbr)*, and investigated their mRNA levels in both the CNS and GIT by  
308 quantitative PCR (qPCR) (Fig. 7A). Compared with those in WT mice, these mRNA  
309 levels were explicitly increased from the stomach through the small intestine of *IP6K2*<sup>-/-</sup>  
310 mice, especially in the duodenum, but not the colon and CNS. To comprehensively  
311 appreciate the role of IP6K2-dependent IP<sub>7</sub> metabolism in neuronal gene regulation in  
312 the mammalian ENS, we isolated the duodenal muscularis externa from WT and  
313 *IP6K2*<sup>-/-</sup> mice and performed whole transcriptome analysis by RNA-sequencing  
314 (RNA-seq) (Fig.7B). Gene set enrichment analysis (GSEA) showed that *IP6K2* deletion  
315 suppressed certain gene sets associated with neural stem/progenitor cells,  
316 oligodendrocyte progenitor cells, and glial cells, concomitantly with the induction of  
317 those of mature neurons such as inhibitory, dopaminergic or GABAergic neurons (Fig.  
318 7C, D and Data S1), implying that inhibition of the IP6K2-IP<sub>7</sub> pathway triggers  
319 neurodevelopmental imbalance in the mammalian ENS. The RNA-seq analysis also  
320 exhibited that 107 and 134 out of 23,405 genes were more than 1.5-fold increased or

321 decreased in *IP6K2*<sup>-/-</sup> with P-value less than 0.05, respectively (Fig. S4A). Pathway  
322 enrichment analysis of these genes showed that transcripts increased more than 1.5-fold  
323 in *IP6K2*<sup>-/-</sup> were significantly enriched for proteins involved in neuronal signaling  
324 (neuroactive ligand-receptor interaction of KEGG annotation) (Fig. S4B). In these  
325 transcripts, we observed that 7 genes associated with neuronal function (*Nckip5d*, and  
326 *Hrh4*) or development (*Noto*, *Tbx1*, *Tbx18*, *Pax7*, and *Mycn*) were prominently altered  
327 in their transcript levels between WT and *IP6K2*<sup>-/-</sup> (Fig. 7E). To validate our RNA-seq  
328 results, differential expression of these 7 neuronal genes were further assessed by qPCR  
329 and all of these candidate genes exhibited similar significant or prominent changes in  
330 transcript levels as observed in RNA-seq results (Fig. 7F). Quantitative PCR analysis  
331 also showed that expression of other neuronal genes, including *Drd5* and *Cckbr*,  
332 explicitly increased in *IP6K2*<sup>-/-</sup> duodenal muscularis externa (Fig. 7G). These changes  
333 were not observed in the RNA-seq analysis possibly because they were below the lower  
334 detection limit and/or quantitation error (Robert and Watson, 2015; Everaert et al, 2017).  
335 Collectively, the IP6K2-IP<sub>7</sub> axis contributes to certain neurotranscriptome profiles  
336 involved in ENS development and functioning.

337

338



## 339 Discussion

340 Mammalian PP-IPs have been implicated in obesity and diseases such as cancer and  
341 neurodegenerative disorders, and thus, their metabolism is a promising drug target  
342 (Shears, 2016; Chakraborty, 2018). For this reason, *in vivo* PP-IP profiling of  
343 mammalian tissues is an important subject of research. However, this objective has been  
344 thwarted by various technical difficulties. Recently, we developed an HILIC-MS/MS  
345 analysis protocol for the sensitive and specific detection of IP<sub>7</sub> and its precursor IP<sub>6</sub> (Ito  
346 et al, 2018). In this study, we quantified *in vivo* PP-IP levels in mammalian organs using  
347 a refined HILIC-MS/MS protocol and evaluated the contribution of IP6K2 to PP-IP  
348 metabolism by analyzing mice lacking this IP<sub>7</sub>-synthesizing kinase.

349 We observed abundant IP<sub>6</sub> and a small but detectable quantity of IP<sub>7</sub> in various  
350 mammalian organs. Specifically, a discernible level of IP<sub>7</sub> was detected in the  
351 mammalian CNS. These results correlate with the fact that expression of the  
352 IP<sub>7</sub>-synthesizing kinases IP6K1 and IP6K2 is ubiquitous and highest in the CNS  
353 (Saiardi et al, 2001; Moritoh et al, 2016; Laha et al, 2021). Since IP<sub>7</sub> levels in the CNS  
354 remain constant irrespective of dietary supply (Fig. 3C and H), it is plausible that  
355 food-derived IP<sub>7</sub> is not directly delivered to the CNS. In agreement with this idea,  
356 previous studies on rodents have reported that food-derived IPs are degraded in the GIT  
357 and released into the circulation as myo-inositol or inositol monophosphate (IP<sub>1</sub>)  
358 (Sakamoto et al, 1993; Eiseman et al, 2011). There is also evidence that circulating  
359 plasma contains no higher order IPs, such as IP<sub>6</sub> (Wilson et al, 2015). Considering our  
360 observation that IP<sub>7</sub> levels were significantly decreased in the CNS of *IP6K2*<sup>-/-</sup> mice  
361 compared with those in WT counterparts (Fig. 5E), it is reasonable to regard the IP<sub>7</sub>  
362 detected in the CNS as endogenously generated. Intriguingly, the IP<sub>7</sub>/IP<sub>6</sub> ratio in the

363 spinal cord was higher than those in the cerebrum and cerebellum, suggesting  
364 heterogeneous IP<sub>7</sub> metabolic activity in the rostral and caudal CNS.

365 Surprisingly, we found that standard diet-fed rodents had far more IP<sub>7</sub> in the GIT than  
366 in the CNS (Fig. 2B). Furthermore, the IP<sub>7</sub>/IP<sub>6</sub> ratio, an indicator of PP-IPs metabolism,  
367 was far higher in the GIT than in the CNS (Fig. 2C). The mouse diet affected the level  
368 of IP<sub>6</sub> and IP<sub>7</sub> in the GIT but did not influence the high IP<sub>7</sub> metabolism, as revealed by  
369 the IP<sub>7</sub>/IP<sub>6</sub> ratio (Fig. 3E and I). The dietary influence on IP<sub>6</sub> and IP<sub>7</sub> levels in the GIT is  
370 likely a direct consequence of the availability of inositol in plant-derived food (CE-2).  
371 Some of this inositol could be generated from IP<sub>6</sub> by intestinal flora (Priyodip et al,  
372 2017) and directly absorbed by inositol transporters such as SMIT1, SMIT2, and HMIT  
373 (Schneider, 2015). A considerable amount of IP<sub>7</sub> was detected in the GIT of rodents  
374 even when the supply of dietary PP-IPs was almost depleted (Fig. 3C and H). The  
375 IP<sub>7</sub>/IP<sub>6</sub> ratio was heterogeneous along the GIT but significantly higher in the proximal  
376 GIT of these dietary PP-IP-depleted rodents (Fig. 3E and I), indicating that substantial  
377 endogenous IP<sub>7</sub> metabolism occurs in the proximal GIT. Accordingly, IP<sub>7</sub> levels in the  
378 stomach and duodenum were significantly diminished in *IP6K2*<sup>-/-</sup> mice under dietary  
379 PP-IP-depleted conditions (Fig. 5E). Therefore, our HILIC-MS/MS analysis  
380 unexpectedly revealed enhanced IP<sub>7</sub> metabolism in the mammalian GIT.

381 The GIT consists of several histological layers including the muscularis externa that  
382 contains the myenteric plexus, a collection of large neuronal assemblies in the GIT. Our  
383 HILIC-MS/MS survey of the proximal GIT clarified that the muscularis externa has a  
384 higher IP<sub>7</sub>/IP<sub>6</sub> ratio than whole GIT tissues, and the duodenal muscle layer has a much  
385 higher IP<sub>7</sub>/IP<sub>6</sub> ratio than those of neighboring GIT segments (Fig. 6D). Considering the  
386 expression of the IP<sub>7</sub>-synthesizing enzyme IP6K2 in the myenteric plexus (Fig. 4A-C)

387 and the significant decrease of  $IP_7/IP_6$  ratio in *IP6K2*-deficient gut and duodenal muscle  
388 layers (Fig. 6J), these observations lead to the idea that *IP6K2* actively synthesizes  
389 endogenous  $IP_7$  in the ENS of the proximal GIT. Our results also implied the presence  
390 of endogenous  $IP_7$  in other GIT layers since total GIT tissues of dietary  $IP_7$ -depleted  
391 (fasted) mice contained a greater amount of  $IP_7$  than their corresponding muscle layers  
392 (Fig. 6C). Since another major nerve plexus exists in the submucosal layer (*i.e.*  
393 submucosal plexus), the submucosal layer may contain endogenous  $IP_7$  to some extent.  
394 This PP-IP might also exist in mucosal epithelium because certain enteroendocrine cells,  
395 including Tuft cells, express *IP6Ks* at the relatively high level (Fig. S3B and C). Tuft  
396 cell is one of rare cell types present in intestinal epithelium. Park et al. recently showed  
397 that Tuft cell development is controlled by inositol polyphosphate multikinase (*IPMK*),  
398 an enzyme responsible for driving *IP* metabolic pathway leading to  $IP_7$  synthesis (Park  
399 et al, 2022). This fact and our data (Fig. S3B and C) encourage to deem that *IP6K2* and  
400  $IP_7$  might underlie Tuft cell physiology as well. Future study is required for assessing  
401 cell type-specific  $IP_7$  metabolism both in enteric neurons as well as in other GIT cells to  
402 more precisely characterize  $IP_7$  metabolism in the GIT.

403 Although *IP6K2* was initially cloned as a  $P_i$  uptake stimulator from a rabbit  
404 duodenum complementary DNA (cDNA) library (Norbis et al, 1997) and was annotated  
405 soon after as encoding an  $IP_7$ -synthesizing enzyme (Saiardi et al, 1999; Schell et al,  
406 1999), the role of *IP6K2* in the GIT has not been investigated until now. In this study,  
407 we observed that *IP6K2* is prominently expressed in myenteric plexus (Fig. 4A-C), and  
408 genetic deletion of *IP6K2* diminishes  $IP_7$  metabolism in the proximal GIT (Fig. 5F) as  
409 well as its muscularis externa containing myenteric plexus (Fig. 6J), suggesting the  
410 presence of an active *IP6K2-IP\_7* pathway in the ENS of the proximal GIT. Our

411 RNA-seq analysis of the duodenal muscularis externa indicated that genetic ablation of  
412 *IP6K2* causes certain gene products associated with mature neurons to accumulate  
413 concomitantly with the reduction of those of neural progenitor/stem cells and glial cells  
414 (Fig. 7C and D). Given that the developmental lineage of enteric neurons comprises  
415 several differentiation points such as neural crest cell migration, neuron-glia bifurcation,  
416 and neural stem/progenitor cell differentiation into mature enteric neurons (Rao and  
417 Gershon, 2018), inhibition of the IP6K2-IP<sub>7</sub> axis possibly causes developmental  
418 imbalances of the ENS at the several differentiation points at least including the  
419 maturation of both enteric neurons and glial cells. This idea is also supported by our  
420 findings that IP6K2 inhibition significantly altered the expression levels of several  
421 transcription factors regulating neural crest cell differentiation (Fig. 7E and F)  
422 (Knoepfler et al, 2002; Vitelli et al, 2002; Abdelkhalek et al, 2004; Bussen et al, 2004;  
423 Basch et al, 2006; Simões-Costa et al, 2012). In fact, IP6K2 activity was shown to be  
424 required for normal migration and development of neural crest cells in zebrafish  
425 (Sarmah and Wente, 2010). Besides, genetic inhibition of *IP6K2* in the duodenal  
426 muscularis externa significantly or prominently changed mRNA levels of several genes  
427 modulating neuronal functions (Fig. 7E, F and G). Notably, *Nckip5d* transcript, one of  
428 the transcripts most significantly induced in *IP6K2*<sup>-/-</sup> duodenal muscularis externa,  
429 contributes to the formation of neural dendrites (Fukuoka et al, 2001; Lee et al, 2006)  
430 and intracellular neuronal signaling (Kim et al, 2009). These pieces of knowledge lead  
431 to the hypothesis that the IP6K2-IP<sub>7</sub> axis might directly or indirectly contribute to  
432 development and several distinct neuronal functions of enteric neurons, even though the  
433 axis does not largely affect the entire morphological output of the ENS (Fig. 6E and F).  
434 Future studies are required for elucidating how these differentially-expressed transcripts

435 controlled by the IP6K2-IP<sub>7</sub> axis individually affect ENS development and functioning.  
436 Developmental and functional ENS defects often result in fatal congenital disorders  
437 (Furness, 2012; Wright et al, 2021), but *IP6K2*<sup>-/-</sup> mice do not show such severe  
438 phenotypic defects: *IP6K2*<sup>-/-</sup> mice are born at Mendelian ratio and grow normally,  
439 similar to WT mice (Rao et al, 2014). Thus, the IP6K2-IP<sub>7</sub> axis might serve as a  
440 fine-tuning factor for the developmental and functional regulation of the ENS, although  
441 we could not exclude the possibility that *IP6K1*, another major IP6K isoform,  
442 compensates for the loss of *IP6K2*. It will be meaningful to see whether ENS-specific  
443 inhibition of IP6K2 and/or IP6K1 influences gastrointestinal pathophysiologies and  
444 development of CNS diseases. Taken together, our observations provide valuable  
445 insights into the field of PP-IP biology and neurogastroenterology.

446 Since dysregulation of IP<sub>7</sub> metabolism links to various human diseases including  
447 neurodegenerative diseases, studying IP<sub>7</sub> metabolism in human organs provides  
448 essential knowledge from the clinical point of view. The refined HILIC-MS/MS  
449 protocol we described in this study is capable of detecting IP<sub>6</sub> and IP<sub>7</sub> not only in rodent  
450 organs but also in human postmortem organs dissected after forensic intervention (Fig.  
451 S5). Unlike in rodents, IP<sub>7</sub> level and IP<sub>7</sub>/IP<sub>6</sub> ratio in the human proximal GITs  
452 (esophagus, greater curvature and lesser curvature of the stomach) were less abundant  
453 compared with those in human CNS. This is probably due to the high turnover rate of  
454 PP-IPs and the delay in dissecting human postmortem organs. Forensic intervention and  
455 subsequent organ dissection take hours after death. The presence of the intestinal flora  
456 may also facilitate the decomposition of these molecules in the GITs (Musshoff et al,  
457 2011). Thus, care should be taken to assess IP<sub>7</sub> metabolism in human GITs. Although  
458 the refined HILIC-MS/MS protocol can detect both IP<sub>7</sub> and IP<sub>8</sub>, this protocol failed to

459 detect endogenous IP<sub>8</sub> in all rodent and human organs examined in this study, even in  
460 mouse GIT where IP<sub>7</sub> was explicitly abundant. This fact suggested that  
461 mammalian-derived IP<sub>8</sub> is far less abundant than IP<sub>7</sub>, and its quantitative evaluation  
462 requires sample pooling or a more sensitive analytical protocol such as CE-MS (Qiu et  
463 al, 2020). In any case, we demonstrated that our novel protocol was able to evaluate IP<sub>7</sub>  
464 metabolism in human organs. Therefore, we foresee the diagnostic potential of our new  
465 analytical technique for analyzing IP<sub>6</sub> and IP<sub>7</sub> levels in clinical biopsy.

466 In conclusion, we investigated the distribution of PP-IPs in mammalian organs using  
467 a refined HILIC-MS/MS protocol and demonstrated that IP6K2-dependent IP<sub>7</sub>  
468 metabolism was enhanced in the ENS of the proximal GIT. This finding was  
469 corroborated by the observation that impairment of IP6K2-dependent IP<sub>7</sub> metabolism  
470 significantly altered certain neurotranscriptome profiles involved in ENS development  
471 and functioning. Further studies are needed to dissect molecular mechanisms underlying  
472 IP6K2-IP<sub>7</sub> axis-mediated neurotranscriptional regulation in the ENS, the role of IP<sub>7</sub> in  
473 neurogastroenterology, and processes involving the gut-brain axis. We believe that these  
474 findings shed new light on the physiological significance of the mammalian PP-IP  
475 pathway as well as the regulatory mechanisms of ENS functioning, which might  
476 contribute to a better understanding of human diseases associated with altered PP-IP  
477 metabolism.

478

479

480 **Acknowledgements**

481 We greatly appreciate Prof. Solomon H. Snyder of Johns Hopkins University for  
482 providing *IP6K2*<sup>-/-</sup> mice, Prof. Kazunori Nakajima and Dr. Yuki Hirota of Keio  
483 University for fruitful discussion, and Prof. Shinji Hadano of Tokai University for  
484 providing organs of purified diet-fed Sprague–Dawley rats. We thank Mr. Shingo Utsuki  
485 of the Liaison Laboratory Research Promotion Center in Kumamoto University for  
486 technical support of RNA sequencing, and the following staff members of the Support  
487 Center for Medical Research and Education of Tokai University for technical assistance:  
488 Akemi Kamijo, Katsuko Naito, Sachie Tanaka, Sanae Ogiwara, and Kayoko Iwao for  
489 animal experiments; Chisa Okada and Yuka Kitamura for confocal microscopic  
490 observation; and Keiko Yokoyama and Sanae Isaki for preliminary microarray  
491 experiments and data analysis. We also thank Editage ([www.editage.jp](http://www.editage.jp)) for English  
492 language editing. This research was partly supported by a Medical Research Council  
493 grant MR/T028904/1 (to A.S.) and grants-in-aid numbers JP19K07851 and  
494 JP22K07379 (to E.N.) and JP20H01002 (to M.I.) for scientific research from Japan  
495 Society for the Promotion of Science.

496

497 **Author contributions**

498 Conceptualization, M.I.; Methodology, M.I.; Investigation, M.I., N.F., S.K., S.H., T.I.,  
499 K.H.; Formal Analysis, M.T., K.K., D.K.; Resources, C.W., Y.K., H.J.J.; Writing –  
500 Original Draft, M.I.; Writing – Review & Editing, M.I., A.S., E.N.; Visualization, M.I.;  
501 Funding Acquisition, M.I., A.S., E.N.; Supervision, A.S., E.N.; Project Administration,  
502 E.N.

503

504 **Competing interests**

505 The authors declare no competing interests.

506



507 **STAR Methods**

508 **Key resources table**

| Reagent or resource                                                                               | Source                   | Identifier                          |
|---------------------------------------------------------------------------------------------------|--------------------------|-------------------------------------|
| <b>Antibodies</b>                                                                                 |                          |                                     |
| Rabbit polyclonal anti-IP6K1                                                                      | Sigma-Aldrich            | Cat# HPA040825<br>RRID: AB_10960426 |
| Goat polyclonal anti-IP6K2 (4F10)                                                                 | Santa Cruz Biotechnology | Cat# sc-130012<br>RRID: AB_2127544  |
| Rabbit polyclonal anti-IP6K2                                                                      | Abcam                    | Cat# ab179921                       |
| Mouse monoclonal anti- $\beta$ -actin (clone AC-15)                                               | Sigma-Aldrich            | Cat# A5441<br>RRID: AB_476744       |
| Mouse monoclonal anti-HuC/D (clone 16A11)                                                         | Thermo Fisher Scientific | Cat# A-21271<br>RRID: AB_221448     |
| Mouse monoclonal anti- $\beta$ III-tubulin (clone TUJ1)                                           | Biologend                | Cat# 801201<br>RRID: AB_2313773     |
| Rabbit immunoglobulin fraction (solid-phase absorbed)                                             | Dako                     | Cat# X0936                          |
| Mouse IgG2a (isotype control)                                                                     | R&D systems              | Cat# MAB003                         |
| Mouse IgG2b (isotype control)                                                                     | Dako                     | Cat# X0944                          |
| F(ab') <sub>2</sub> -Goat anti-Mouse IgG (H+L) Cross-Adsorbed Secondary Antibody, Alexa Fluor 594 | Thermo Fisher Scientific | Cat# A-11020<br>RRID: AB_2534087    |

|                                                                                                    |                           |                                                                       |
|----------------------------------------------------------------------------------------------------|---------------------------|-----------------------------------------------------------------------|
| F(ab') <sub>2</sub> -Goat anti-Rabbit IgG (H+L) Cross-Adsorbed Secondary Antibody, Alexa Fluor 488 | Thermo Fisher Scientific  | Cat# A-11070<br>RRID: AB_2534114                                      |
| Target Retrieval Solution                                                                          | Dako                      | Cat# S1699                                                            |
| Chemicals, peptides, and recombinant proteins                                                      |                           |                                                                       |
| LC-MS grade acetonitrile                                                                           | Honeywell                 | Cat# 349672.5                                                         |
| LC-MS grade ammonium bicarbonate                                                                   | Honeywell                 | Cat# 40867-50G                                                        |
| Ultrapure water                                                                                    | Wako Pure Chemical        | Cat# 210-01303                                                        |
| Ultrapure-grade ammonium hydroxide                                                                 | Kanto Chemical            | Cat# 01266-3B                                                         |
| InfinityLab deactivator additive                                                                   | Agilent Technologies      | Cat# 5191-3940                                                        |
| Inositol hexakisphosphate (IP <sub>6</sub> )                                                       | Sigma-Aldrich             | Cat# 68388                                                            |
| Sodium fluoride (NaF)                                                                              | Sigma-Aldrich             | Cat# S7920                                                            |
| Hexadeutero-myo-inositol trispyrophosphate (ITPP-d <sub>6</sub> )                                  | Toronto Research Chemical | Cat# I666022                                                          |
| Diphosphoinositol pentakisphosphate (IP <sub>7</sub> )                                             | This manuscript           | N/A                                                                   |
| Bisdiphosphoinositol tetrakisphosphate (IP <sub>8</sub> )                                          | This manuscript           | N/A                                                                   |
| HILICpak VG50 2D analytical column                                                                 | Shodex                    | Cat# F7630300                                                         |
| HILICpak VG50G 2A guard column                                                                     | Shodex                    | Cat# F6711200                                                         |
| Titansphere TiO <sub>2</sub> bead                                                                  | GL Science                | Cat# 5020-75000                                                       |
| Standard diet: CE-2                                                                                | Clea Japan                | <a href="https://www.clea-japan.com/">https://www.clea-japan.com/</a> |
| Purified diet: iVid-neo                                                                            | Oriental Kobo             | <a href="https://www.oyc.co.jp/en/">https://www.oyc.co.jp/en/</a>     |
| Purified diet: 70% casein                                                                          | Clea Japan                | <a href="https://www.clea-japan.com/">https://www.clea-japan.com/</a> |

|                                                                          |                                                     |                                                                                                                                                       |
|--------------------------------------------------------------------------|-----------------------------------------------------|-------------------------------------------------------------------------------------------------------------------------------------------------------|
| TRIzol reagent                                                           | Thermo Fisher Scientific                            | Cat# 15596026                                                                                                                                         |
| TruSeq Stranded mRNA Kit                                                 | Illumina                                            | Cat# 20020594                                                                                                                                         |
| KAPA SYBR Fast qPCR kit                                                  | Kapa Biosystems                                     | Cat# KK4602                                                                                                                                           |
| Immobilon Western Chemiluminescent HRP Substrate                         | Millipore                                           | Cat# WBKLS0500                                                                                                                                        |
| Deposited data                                                           |                                                     |                                                                                                                                                       |
| Human embryonic intestinal cell scRNA-seq datasets                       | Fawcner-Corbet et al, (2021)                        | Human Fetal Gut Atlas ( <a href="https://simmons-lab.shinyapps.io/FetalAtlasDataPortal/">https://simmons-lab.shinyapps.io/FetalAtlasDataPortal/</a> ) |
| Mouse embryonic enteric nerve cell scRNA-seq datasets                    | Morarach et al, (2021)                              | GEO: GSE149524                                                                                                                                        |
| Mouse embryonic intestinal epithelial cell scRNA-seq datasets            | Haber et al, (2017)                                 | GEO: GSE92332                                                                                                                                         |
| RNA-seq data                                                             | This manuscript                                     | DDBJ: DRA014733                                                                                                                                       |
| Experimental models: Cell lines                                          |                                                     |                                                                                                                                                       |
| HCT116                                                                   | RIKEN                                               | RCB2979<br>RRID: CVCL_0291                                                                                                                            |
| Experimental models: Organisms/strains                                   |                                                     |                                                                                                                                                       |
| Mouse: C57BL/6J                                                          | Clea Japan                                          | C57BL/6Jc1                                                                                                                                            |
| Mouse: <i>IP6K2</i> <sup>-/-</sup> (B6;129S-Ip6k2 <sup>tm1Snyd/J</sup> ) | Laboratory of Solomon H. Snyder, Jackson Laboratory | Rao et al, (2014)<br>Stock# 036426<br>RRID: IMSR_JAX:036426                                                                                           |
| Rat: Sprague-Dawley                                                      | Clea Japan                                          | Jcl:SD                                                                                                                                                |
| Oligonucleotides                                                         |                                                     |                                                                                                                                                       |
| Primers for qPCR: please see Table S3                                    | This manuscript                                     | N/A                                                                                                                                                   |
| Software and algorithms                                                  |                                                     |                                                                                                                                                       |

|                                                   |                          |                                                                                                                                               |
|---------------------------------------------------|--------------------------|-----------------------------------------------------------------------------------------------------------------------------------------------|
| LCMS solution (version 5.99)                      | Shimadzu                 | <a href="https://www.shimadzu.com">https://www.shimadzu.com</a>                                                                               |
| Seurat R package version 4.0.0                    | Butler et al, 2018       | <a href="http://satijalab.org/seurat/">http://satijalab.org/seurat/</a><br>RRID: SCR_007322                                                   |
| Trim Galore (version 0.6.7)                       | Babraham institute       | <a href="https://www.bioinformatics.babraham.ac.uk/projects/trim_galore/">https://www.bioinformatics.babraham.ac.uk/projects/trim_galore/</a> |
| HISAT2 (version 2.1.1)                            | Kim et al, 2019          | <a href="https://github.com/DaehwanKimLab/hisat2">https://github.com/DaehwanKimLab/hisat2</a>                                                 |
| MarkDuplicates module of the Picard package       | Broad Institute          | <a href="http://broadinstitute.github.io/picard/">http://broadinstitute.github.io/picard/</a>                                                 |
| TPMCalculator (version 0.0.3)                     | Vera Alvarez et al, 2019 | <a href="https://github.com/ncbi/TPMCalculator">https://github.com/ncbi/TPMCalculator</a>                                                     |
| EdgeR module of the TCC software (version 1.30.0) | Sun et al, 2013          | <a href="http://bioconductor.org/">http://bioconductor.org/</a>                                                                               |
| The Molecular Signatures Database (version 7.5.1) | Liberzon et al, 2015     | <a href="http://www.gsea-msigdb.org/gsea/msigdb/index.jsp">http://www.gsea-msigdb.org/gsea/msigdb/index.jsp</a>                               |
| DAVID Gene Ontology Analysis (version 6.8)        | Huang da et al, 2009     | <a href="http://david.abcc.ncifcrf.gov/">http://david.abcc.ncifcrf.gov/</a><br>RRID: SCR_001881                                               |
| Other                                             |                          |                                                                                                                                               |
| LCMS-8050 mass spectrometer                       | Shimadzu                 | <a href="https://www.shimadzu.com">https://www.shimadzu.com</a>                                                                               |
| NextSeq500 sequencer                              | Illumina                 | <a href="https://www.illumina.com/">https://www.illumina.com/</a>                                                                             |
| LSM 880 microscope                                | Carl Zeiss               | <a href="https://www.zeiss.com/">https://www.zeiss.com/</a>                                                                                   |
| EzCapture MZ chemiluminescent detector            | ATTO                     | <a href="https://www.attoeng.site/">https://www.attoeng.site/</a>                                                                             |
| StepOne Plus Real-Time PCR system                 | Applied Biosystems       | <a href="https://www.thermofisher.com/">https://www.thermofisher.com/</a>                                                                     |
| 4150 TapeStation System                           | Agilent Technologies     | <a href="https://www.agilent.com">https://www.agilent.com</a>                                                                                 |
| NanoDrop 8000 spectrophotometer                   | Thermo Fisher Scientific | <a href="https://www.thermofisher.com/">https://www.thermofisher.com/</a>                                                                     |

509

510 **RESOURCE AVAILABILITY**

511 **Lead contact**

512 Further information and requests for resources and reagents should be directed to and  
513 will be fulfilled by the Lead Contact, Eiichiro Nagata ([enagata@is.icc.u-tokai.ac.jp](mailto:enagata@is.icc.u-tokai.ac.jp)) or  
514 Masatoshi Ito ([masa104-ito@tokai-u.jp](mailto:masa104-ito@tokai-u.jp)).

515 **Materials availability**

516 Requests for materials generated in this study should be directed to the Lead Contact.  
517 The availability of these materials may be limited because their chemical synthesis  
518 requires multiple laborious and costly processes.

519 **Data and code availability**

520 The raw RNA-seq data have been deposited at the DNA Data Bank of Japan (DDBJ)  
521 and are publicly available as of the date of publication (accession number DRA014733).  
522 Raw GSEA data shown in Fig. 7C are available in the Data S1 file. Other individual  
523 datasets and corresponding files generated in this study are available upon reasonable  
524 request from the Lead Contact.

525

526 **EXPERIMENTAL MODEL AND SUBJECT DETAILS**

527 **Cell culture**

528 HCT116 cells were cultured in DMEM (Nacalai Tesque, Kyoto, Japan) supplemented  
529 with 10% FBS in 5% CO<sub>2</sub>. Cells prepared at 60% confluence in 10 cm dishes were  
530 incubated for 1 h with or without 50 mM sodium fluoride (Sigma-Aldrich, St. Louis,  
531 MO, USA). After washing twice with PBS, the cells were lysed in cell lysis buffer  
532 (0.01% Triton X-100, 1 mM EDTA, 20 mM Tris-HCl). A small aliquot was set aside for  
533 protein quantitation, and the rest was used for purification of IPs.

534

535 **Mouse organs**

536 All experiments involving animals were performed in accordance with protocols  
537 approved by institutional animal care guidelines (Tokai University School of Medicine).  
538 Male C57 BL/6J mice and Sprague–Dawley rats obtained from Clea Japan (Tokyo,  
539 Japan) were maintained on a standard diet (CE-2; Clea Japan) or purified diet (iVid-neo;  
540 Oriental Kobo, 70% casein; Clea Japan). Some mice fed a standard diet or purified diet  
541 were fasted for 48 h before sacrifice. *IP6K2*<sup>-/-</sup> and WT mice maintained on a standard  
542 diet were switched to the purified diet for a week and subsequently fasted for 48 h  
543 before sacrifice. During fasting, mouse cages were changed to clean ones with new  
544 bedding every 24 h to reduce coprophagy. Mice and rats were anesthetized using  
545 isoflurane and then sacrificed by whole blood withdrawal from the left atrium. Before  
546 dissection of the organs, the animals were perfused transcardially with ice-cold PBS to  
547 wash out the residual blood and prevent the detection of IPs derived from blood cells.  
548 GIT organs (stomach, duodenum, small intestine, and colon) were cut open to remove  
549 feces and then extensively rinsed with PBS to wash out any dietary residuals. The  
550 duodenum, small intestine, and colon were harvested by cutting a 5 cm (mouse) or 10  
551 cm (rat) segment from the distal end of stomach, between 10 and 15 cm (mouse) or 20  
552 and 30 cm (rat) away from the duodenum and from the anus, respectively. The  
553 harvested organs were frozen until further use.

554

555 **Isolation of muscularis externa from mouse GITs**

556 The muscularis externa containing myenteric plexuses was prepared from mouse  
557 GITs as previously described with some modification (Fujita et al, 2018; Ahrends et al,  
558 2022). For HILIC-MS/MS, mouse GIT segments were cut open along the attachment

559 line of the mesentery and then placed onto a cold surface with the muscularis externa  
560 facing up. The muscularis externa of the GIT segments was isolated by gently scraping  
561 the outer layer with watchmaker tweezers under a binocular stereomicroscope. For  
562 whole-mount immunostaining, the mouse duodenum was cut open along the mesentery  
563 line, pinned onto a rubber plate, and then fixed with 4% paraformaldehyde (PFA)  
564 overnight at 4 °C. The muscularis layer was then gently separated from the GIT  
565 segment using watchmaker tweezers and a cotton swab under a binocular  
566 stereomicroscope. For RNA extraction, mouse GITs were immersed in saturated  
567 ammonium sulfate solution containing 20 mM EDTA and 25 mM sodium citrate  
568 (pH5.2) to inhibit RNA degradation. The muscularis externa of the segments was placed  
569 over a glass rod and then peeled away using a cotton swab along the attachment line of  
570 the mesentery under a binocular stereomicroscope as described previously (Smith et al,  
571 2013). Isolated muscularis externa was stored in saturated ammonium sulfate solution  
572 and then frozen until further use.

573

#### 574 **Human postmortem organs**

575 The human study was approved by the Ethics Committee of Tokai University  
576 (institutional review board number: 20I-02), and the study protocol conformed to the  
577 ethical guidelines of the 1975 Declaration of Helsinki (World Medical Association,  
578 2013). Written informed consent, allowing the experimental use of the organ samples,  
579 was obtained from the relatives of all subjects. Human postmortem organs were  
580 obtained at autopsies from three donated bodies (two men and one woman; mean age,  
581  $62.3 \pm 22.8$  years; average body mass index,  $26.4 \pm 6.6$ ). Some anomalies, such as  
582 cardiac hypertrophy, were observed in their bodies by a forensic pathologist. To

583 minimize organ decomposition, organ sampling was confined to cases where the death  
584 date and ambient temperature were explicit and the accumulated degree-days [ADD;  
585 environmental temperature ( $^{\circ}\text{C}$ )  $\times$  postmortem interval (day)] value—an index for  
586 evaluating the quality of forensic samples (Pittner *et al*, 2016)—of all three bodies were  
587 very low (close to or less than 20). The harvested organ samples (approximately 400  
588 mg) were frozen until further use.

589

## 590 **METHOD DETAILS**

### 591 **Gel electrophoresis of synthetic PP-IPs**

592 IP<sub>7</sub> and IP<sub>8</sub> were synthesized from myo-inositol using fluorenylmethyl phosphoramidite  
593 chemistry as described previously (Pavlovic *et al*, 2016). The synthetic PP-IPs were  
594 validated using polyacrylamide gel electrophoresis as previously described (Losito *et al*,  
595 2009). Briefly, synthetic PP-IPs samples mixed with orange G and bromophenol blue  
596 loading buffer were applied onto 35% polyacrylamide/Tris-borate-EDTA gel. The  
597 samples were electrophoresed overnight at 4  $^{\circ}\text{C}$  at 600 V and 6 mA until the orange G  
598 and bromophenol blue had run through two-thirds of the gel. Gels were stained with  
599 toluidine blue and scanned using a computer scanner.

600

### 601 **Purification of IPs**

602 IPs in biological samples were purified as described previously (Wilson *et al*, 2015),  
603 with some modification. Frozen organs, diets, and feces samples were homogenized  
604 using a Shake Master Neo (Bio Medical Science, Tokyo, Japan) in 500  $\mu\text{L}$  of ultrapure  
605 water. Feces samples were air-dried overnight before homogenization for accurate  
606 comparison of IP<sub>6</sub> and IP<sub>7</sub> concentrations with those in the diet. Crude lysate was mixed



607 with an equal volume of 2 M perchloric acid (PCA), incubated on ice for 30 min, and  
608 centrifuged to remove tissue debris. After spiking with 3 nmol of ITPP-d<sub>6</sub> as an internal  
609 control, 5 mg of TiO<sub>2</sub> beads (GL Sciences, Tokyo, Japan) were added to each sample.  
610 The beads were incubated at 4 °C for 30 min and washed twice with 1 M PCA, and then  
611 200 µL of 10% ammonium hydroxide was added for IP elution. The elution step was  
612 repeated to maximize recovery. The total eluate was dried using a SpeedVac  
613 concentrator (Thermo Fisher Scientific, Waltham, MA, USA) and reconstituted in 125  
614 µL of 100 mM ammonium carbonate/40% acetonitrile buffer, 50 µL of which was used  
615 for LC-MS.

616

#### 617 **HILIC-MS/MS analysis for PP-IPs**

618 Chromatographic experiments were performed using a Nexera UHPLC instrument  
619 (Shimadzu, Kyoto, Japan). HILIC-based chromatographic separation of IP<sub>6</sub>, IP<sub>7</sub>, IP<sub>8</sub>,  
620 and the internal control ITPP-d<sub>6</sub> was achieved using a modified version of a previously  
621 described procedure (Ito et al, 2018). The mobile phase was composed of 300 mM  
622 ammonium bicarbonate buffer (pH 10.5) containing 0.1% InfinityLab deactivator  
623 additive (Agilent Technologies) as the aqueous mobile phase (eluent A), and 90%  
624 acetonitrile containing 10 mM ammonium bicarbonate buffer (pH 10.5) and 0.1%  
625 InfinityLab deactivator additive as the organic mobile phase (eluent B). Eluent B  
626 included more than 10% aqueous solvent to prevent polymeric aggregation of the major  
627 constituent (medronic acid) in the additive. In the entire LC system, chromatographic  
628 stainless steel tube was treated with 0.5% phosphoric acid in 90% acetonitrile overnight  
629 before analysis to block undesirable adsorption of analytes on the surface of the inner  
630 wall of the tube, while paying attention not to run the solvent into the mass spectrometer.

631 The total flow rate of the mobile phase was 0.4 mL/min. Linear gradient separation was  
632 achieved as follows: 0–2 min, 75% B; 2–12 min, 75%–2% B; 12–15 min, 2% B.

633

#### 634 **RNA extraction and quantitative PCR analysis**

635 GIT segments and their muscularis externa were carefully collected and subjected to  
636 RNA extraction, as previously described (Augereau et al, 2016). Total RNA was  
637 extracted using TRIzol reagent (Invitrogen, Carlsbad, CA, USA). RNA concentration  
638 and quality were determined using a NanoDrop 8000 spectrophotometer (Thermo  
639 Fisher Scientific) and the 4150 TapeStation system (Agilent Technologies), respectively.  
640 Complementary DNA was generated using the High-Capacity Reverse Transcription Kit  
641 (Applied Biosystems). qPCR was performed using the KAPA SYBR Fast qPCR kit  
642 (Kapa Biosystems, Wilmington, MA, USA) and a StepOne Plus Real-Time PCR system  
643 (Applied Biosystems, Foster City, CA, USA). The primer sequences used in this study  
644 are listed in Table S3.

645

#### 646 **RNA sequencing**

647 Total RNA samples of WT and *IP6K2*-deficient duodenal muscle externa with around  
648 7.0 of RNA integrity number were subjected to RNA-seq analysis. RNA sequencing  
649 libraries were prepared using TruSeq Stranded mRNA Kit (Illumina, San Diego, CA,  
650 USA) according to the manufacturer's instructions. Each library was sequenced in 1 ×  
651 75 bp of single read mode using a NextSeq 500 platform (Illumina). Adapter sequences  
652 are removed from sequencing reads using Trim Galore (version 0.6.7;  
653 [https://www.bioinformatics.babraham.ac.uk/projects/trim\\_galore/](https://www.bioinformatics.babraham.ac.uk/projects/trim_galore/)). Sequence reads were  
654 aligned to mouse genome (mm10) by HISAT2 (version 2.1.1) (Kim et al, 2018).

655 Duplicate reads were removed using the MarkDuplicates module of the Picard package  
656 (version 2.27.3; <http://broadinstitute.github.io/picard/>). The following genes were  
657 excluded before processing for the expression data analysis: highly expressing mucosal  
658 digestive enzyme genes (*Amy2a1*, *Amy2a2*, *Amy2a3*, *Amy2a4*, *Amy2a5*, *Amy2b*, *Amy1*,  
659 *Try4*, *Try5*, *Try10*) contaminated during the muscularis isolation, mitochondrial genes,  
660 and long non-coding RNAs. Expression levels of genes annotated in GENCODE  
661 (version M25) were quantitated by TPMCalculator (version 0.0.3) (Vera Alvarez et al,  
662 2019). The software described above was run with the default parameters. Differentially  
663 expressed genes were identified by the EdgeR module of the TCC software (version  
664 1.30.0) (Sun et al, 2013). GSEA was performed as described previously (Subramanian  
665 et al, 2005). Gene sets used in this study were retrieved from The Molecular Signatures  
666 Database (version 7.5.1; <http://www.gsea-msigdb.org/gsea/msigdb/index.jsp>) (Liberzon  
667 et al, 2015). Pathway enrichment analysis was performed using the online database  
668 DAVID (<http://david.abcc.ncifcrf.gov>) (Huang da et al, 2009).

669

#### 670 **Western blot analysis**

671 Western blot analysis was performed as previously described (Nagata et al, 2011).  
672 Membranes were incubated with anti-IP6K1 (Sigma-Aldrich), anti-IP6K2 (Santa Cruz  
673 Biotechnology, Dallas, TX, USA) and anti- $\beta$ -actin (Sigma-Aldrich) primary antibodies  
674 overnight at 4°C. After rinsing 3 times in PBS containing 0.05% Tween-20, the  
675 membranes were incubated with the appropriate secondary antibodies conjugated with  
676 horseradish peroxidase (HRP) (donkey anti-rabbit IgG, HRP-linked F(ab')<sub>2</sub> fragment or  
677 sheep anti-mouse IgG, HRP-linked F(ab')<sub>2</sub> fragment; GE Healthcare, Buckinghamshire,  
678 UK). The immunoreactivities of the primary antibodies were visualized with Immobilon

679 Western Chemiluminescent HRP Substrate (Millipore, Billerica, MA, USA) and  
680 recorded using an Ez-Capture Analyzer (ATTO, Tokyo, Japan).

681

## 682 **Immunohistochemistry**

683 Preparation of formalin-fixed, paraffin-embedded (FFPE) sections was described  
684 previously (Nagata et al, 2016). After deparaffinization and rehydration, the mouse  
685 tissue sections were incubated with Target Retrieval Solution (Dako, Glostrup,  
686 Denmark) at 98 °C for 10 min. Thereafter, the sections were washed thrice with 0.05%  
687 Tween-20 in Tris-buffered saline (TBS), blocked using 5% normal goat serum for 15  
688 min, and then incubated with primary antibodies against IP6K2 (1:100, ab179921,  
689 Abcam, Cambridge, MA, USA) or HuC/D (1:100, A-21271, Thermo Fisher Scientific)  
690 overnight at 4 °C. Rabbit immunoglobulin (Dako) and mouse IgG2b isotype control  
691 (Dako) were used to evaluate non-specific binding. After rinsing thrice with 0.05%  
692 Tween-20 in TBS, the sections were incubated with secondary goat anti-rabbit IgG  
693 Alexa 488 (1:350, A-11070, Thermo Fisher Scientific) and goat anti-mouse IgG Alexa  
694 594 (1:350, A-11020, Thermo Fisher Scientific) antibodies for 30 min at room  
695 temperature. The sections were then washed thrice with 0.05% Tween-20 in TBS and  
696 mounted using anti-fading medium (12.5 mg/mL DABCO, 90% glycerol, pH 8.8 in  
697 PBS). Confocal fluorescence images were obtained using a LSM 880 microscope (Carl  
698 Zeiss, Jena, Germany).

699

## 700 **Whole-mount immunostaining**

701 Immunostaining of duodenal muscularis externa was performed as previously described  
702 with minor modifications (Fujita et al, 2018; Ahrends et al, 2022). Briefly, duodenal

703 muscularis externa isolated from WT and *IP6K2*<sup>-/-</sup> mice were blocked with 3% BSA  
704 blocking solution containing the corresponding isotype control antibodies for 2 days  
705 after fixation with 4% PFA overnight. The muscle layers were then washed with PBS  
706 containing 0.05% Triton X-100 and incubated with diluted primary antibodies against  
707 HuC/D (Thermo Fisher Scientific) or  $\beta$ III-Tubulin (Biolegend, San Diego, CA, USA)  
708 for 3 days. After rinsing thrice with 0.05% Triton X-100 in PBS, the muscularis externa  
709 were then incubated with secondary goat anti-mouse IgG Alexa 594 (1:350, A-11020,  
710 Thermo Fisher Scientific) for 3 h at room temperature. The samples were then washed  
711 thrice with 0.05% Triton X-100 in PBS and mounted using anti-fading medium (12.5  
712 mg/mL DABCO, 90% glycerol, pH 8.8 in PBS). Fluorescence images were obtained  
713 using a LSM 880 confocal microscope (Carl Zeiss).

714

#### 715 **Computational analysis of scRNA-seq datasets**

716 Publicly available human embryonic intestine scRNA-seq processed data  
717 (Fawkner-Corbett et al, 2021) and mouse embryonic ENS matrix data (Morarach et al,  
718 2021) were downloaded from the Human Fetal Gut Atlas  
719 (<https://simmons-lab.shinyapps.io/FetalAtlasDataPortal/>) and the GEO database  
720 (identifier: GSE149524), respectively. Mouse embryonic intestinal epithelial cell data  
721 (Haber et al, 2017) were obtained from the GEO database (identifier: GSE92332). The  
722 above datasets were analyzed using the R package Seurat version 4.0.0 (Butler et al,  
723 2018) to perform dimensionality reduction by uniform manifold approximation and  
724 projection and/or generate dot plots showing the relative expression of IP6Ks across  
725 different clusters.

726

727 **QUANTIFICATION AND STATISTICAL ANALYSIS**

728 Data are expressed as the mean  $\pm$  SD. Differences between two or more groups were  
729 analyzed using two-tailed Student's *t*-test or one-way analysis of variance (ANOVA)  
730 followed by Bonferroni-type post-hoc test, respectively. In RNA-seq analyses, P values  
731 were determined using the corresponding analytical tools. Statistical significance was  
732 set at  $P < 0.05$ .

733

734

735 **References**

- 736 1. Abdelkhalek HB, Beckers A, Schuster-Gossler K, Pavlova MN, Burkhardt H,  
737 Lickert H, Rossant J, Reinhardt R, Schalkwyk LC, Müller I, et al. (2004) The  
738 mouse homeobox gene *Not* is required for caudal notochord development and  
739 affected by the truncate mutation. *Genes & Dev.* 18: 1725-1736  
740 [[10.1101/gad.303504](https://doi.org/10.1101/gad.303504)]
- 741 2. Ahrends T, Weiner M, and Mucida D (2022) Isolation of myenteric and submucosal  
742 plexus from mouse gastrointestinal tract and subsequent flow cytometry and  
743 immunofluorescence. *STAR Protoc.* 3: 101157 [[10.1016/j.xpro.2022.101157](https://doi.org/10.1016/j.xpro.2022.101157)].
- 744 3. Augereau C, Lemaigre FP, and Jacquemin P (2016) Extraction of high-quality RNA  
745 from pancreatic tissues for gene expression studies. *Anal. Biochem.* 500: 60-62  
746 [[10.1016/j.ab.2016.02.008](https://doi.org/10.1016/j.ab.2016.02.008)].
- 747 4. Azevedo C, and Saiardi A (2006) Extraction and analysis of soluble inositol  
748 polyphosphates from yeast. *Nat. Protoc.* 1: 2416-2422 [[10.1038/nprot.2006.337](https://doi.org/10.1038/nprot.2006.337)].
- 749 5. Basch M, Bronner-Fraser M, and García-Castro MI (2006) Specification of the  
750 neural crest occurs during gastrulation and requires Pax7. *Nature* 441: 218-222  
751 [[10.1038/nature04684](https://doi.org/10.1038/nature04684)]
- 752 6. Bussen M, Petry M, Schuster-Gossler K, Leitges M, Gossler A, and Kispert A  
753 (2004) The T-box transcription factor Tbx18 maintains the separation of anterior  
754 and posterior somite compartments. *Genes & Dev.* 18: 1209-1221  
755 [[10.1101/gad.300104](https://doi.org/10.1101/gad.300104)]
- 756 7. Butler A, Hoffman P, Smibert P, Papalexi E, and Satija R (2018) Integrating  
757 single-cell transcriptomic data across different conditions, technologies, and  
758 species. *Nat. Biotechnol.* 36: 411-420 [[10.1038/nbt.4096](https://doi.org/10.1038/nbt.4096)].

- 759 8. Cao J, O'Day DR, Pliner HA, Kingsley PD, Deng M, Daza RM, Zager MA,  
760 Aldinger KA, Blecher-Gonen R, Zhang F, et al. (2020) A human cell atlas of fetal  
761 gene expression. *Science* 370: eaba7721 [[10.1126/science.aba7721](https://doi.org/10.1126/science.aba7721)]
- 762 9. Chakraborty A (2018) The inositol pyrophosphate pathway in health and diseases.  
763 *Biol. Rev. Camb. Philos. Soc.* 93: 1203-1227 [[10.1111/brv.12392](https://doi.org/10.1111/brv.12392)].
- 764 10. Chakraborty A, Koldobskiy MA, Bello NT, Maxwell M, Potter JJ, Juluri KR,  
765 Maag D, Kim S, Huang AS, Dailey MJ, et al. (2010) Inositol pyrophosphates  
766 inhibit Akt signaling, thereby regulating insulin sensitivity and weight gain. *Cell*  
767 143: 897-910 [[10.1016/j.cell.2010.11.032](https://doi.org/10.1016/j.cell.2010.11.032)].
- 768 11. Crocco P, Saiardi A, Wilson MS, Maletta R, Bruni AC, Passarino G, and Rose G  
769 (2016) Contribution of polymorphic variation of inositol hexakisphosphate kinase  
770 3 (IP6K3) gene promoter to the susceptibility to late onset Alzheimer's disease.  
771 *Biochim. Biophys. Acta* 1862: 1766-1773 [[10.1016/j.bbadis.2016.06.014](https://doi.org/10.1016/j.bbadis.2016.06.014)].
- 772 12. Draskovic P, Saiardi A, Bhandari R, Burton A, Ilc G, Kovacevic M, Snyder SH,  
773 and Podobnik M (2008) Inositol hexakisphosphate kinase products contain  
774 diphosphate and triphosphate groups. *Chem. Biol.* 15: 274-286  
775 [[10.1016/j.chembiol.2008.01.011](https://doi.org/10.1016/j.chembiol.2008.01.011)].
- 776 13. Dong J, Ma G, Sui L, Wei M, Satheesh V, Zhang R, Ge S, Li J, Zhang TE, Wittwer  
777 C, et al. (2019) Inositol Pyrophosphate InsP8 Acts as an Intracellular Phosphate  
778 Signal in Arabidopsis. *Mol. Plant.* 12: 1463-1473 [[10.1016/j.molp.2019.08.002](https://doi.org/10.1016/j.molp.2019.08.002)].
- 779 14. Dorsch JA, Cook A, Young K, Anderson JM, Bauman AT, Volkmann CJ, Murthy  
780 PPN, and Raboy V (2003) Seed phosphorus and inositol phosphate phenotype of  
781 barley low phytic acid genotypes. *Phytochemistry* 62: 691-706  
782 [[10.1016/s0031-9422\(02\)00610-6](https://doi.org/10.1016/s0031-9422(02)00610-6)].



- 783 15. Duong QH, Clark KD, Lapsley KG, and Pegg RB (2017) Quantification of  
784 inositol phosphates in almond meal and almond brown skins by HPLC/ESI/MS.  
785 *Food Chem.* 229: 84-92 [[10.1016/j.foodchem.2017.02.031](https://doi.org/10.1016/j.foodchem.2017.02.031)].
- 786 16. Eiseman J, Lan J, Guo J, Joseph E, and Vucenik I (2011) Pharmacokinetics and  
787 tissue distribution of inositol hexaphosphate in C.B17 SCID mice bearing human  
788 breast cancer xenografts. *Metabolism* 60: 1465-1474  
789 [[10.1016/j.metabol.2011.02.015](https://doi.org/10.1016/j.metabol.2011.02.015)].
- 790 17. Everaert C, Luypaert M, Maag JLV, Cheng QX, Dinger ME, Hellemans J, and  
791 Mestdagh P (2017) Benchmarking of RNA-sequencing analysis workflows using  
792 whole-transcriptome RT-qPCR expression data. *Sci. Rep.* 7: 1559  
793 [[10.1038/s41598-017-01617-3](https://doi.org/10.1038/s41598-017-01617-3)]
- 794 18. Fan X, Dong J, Zhong S, Wei Y, Wu Q, Yan L, Yong J, Sun L, Wang X, Zhao Y, et  
795 al. (2018) Spatial transcriptomic survey of human embryonic cerebral cortex by  
796 single-cell RNA-seq analysis. *Cell Res.* 28: 730-745  
797 [[10.1038/s41422-018-0053-3](https://doi.org/10.1038/s41422-018-0053-3)]
- 798 19. Fawkner-Corbett D, Antanaviciute A, Parikh K, Jagielowicz M, Gerós AS, Gupta  
799 T, Ashley N, Khamis D, Fowler D, Morrissey E, et al. (2021) Spatiotemporal  
800 analysis of human intestinal development at single-cell resolution. *Cell* 184:  
801 810-826.e23 [[10.1016/j.cell.2020.12.016](https://doi.org/10.1016/j.cell.2020.12.016)].
- 802 20. Fu C, Xu J, Cheng W, Rojas T, Chin AC, Snowman AM, Harraz MM, and Snyder  
803 SH (2017) Neuronal migration is mediated by inositol hexakisphosphate kinase 1  
804 via alpha-actinin and focal adhesion kinase. *Proc. Natl. Acad. Sci. U. S. A.* 114:  
805 2036-2041 [[10.1073/pnas.1700165114](https://doi.org/10.1073/pnas.1700165114)].
- 806 21. Fujita M, Yagi T, Okura U, Tanaka J, Hirashima N, and Tanaka M (2018)

- 807 Calcineurin B1 deficiency in glial cells induces mucosal degeneration and  
808 inflammation in mouse small intestine. *Biol. Pharm. Bull.* 41: 786-796.  
809 [[10.1248/bpb.b18-00041](https://doi.org/10.1248/bpb.b18-00041)]
- 810 22. Fukuoka M, Suetsugu S, Miki H, Fukami K, Endo T, and Takenawa T (2001) A  
811 novel neural Wiskott-Aldrich syndrome protein (N-WASP) binding protein, WISH,  
812 induces Arp2/3 complex activation independent of Cdc42. *J. Cell Biol.* 152:  
813 471-482 [[10.1083/jcb.152.3.471](https://doi.org/10.1083/jcb.152.3.471)]
- 814 23. Furness JB (2012) The enteric nervous system and neurogastroenterology. *Nat.*  
815 *Rev. Gastroenterol. Hepatol.* 9: 286-294 [[10.1038/nrgastro.2012.32](https://doi.org/10.1038/nrgastro.2012.32)]
- 816 24. Ghoshal S, Zhu Q, Asteian A, Lin H, Xu H, Ernst G, Barrow JC, Xu B, Cameron  
817 MD, Kamenecka TM, et al. (2016) TNP [N2-(m-Trifluorobenzyl),  
818 N6-(p-nitrobenzyl)purine] ameliorates diet induced obesity and insulin resistance  
819 via inhibition of the IP6K1 pathway. *Mol. Metab.* 5: 903-917  
820 [[10.1016/j.molmet.2016.08.008](https://doi.org/10.1016/j.molmet.2016.08.008)].
- 821 25. Gremel G, Wanders A, Cedernaes J, Fagerberg L, Hallström B, Edlund K, Sjöstedt  
822 E, Uhlén M, and Pontén F (2015) The human gastrointestinal tract-specific  
823 transcriptome and proteome as defined by RNA sequencing and antibody-based  
824 profiling. *J. Gastroenterol.* 50: 46-57 [[10.1007/s00535-014-0958-7](https://doi.org/10.1007/s00535-014-0958-7)].
- 825 26. Gu C, Liu J, Liu X, Zhang H, Luo J, Wang H, Locasale JW, and Shears SB (2021)  
826 Metabolic supervision by PPIP5K, an inositol pyrophosphate kinase/phosphatase,  
827 controls proliferation of the HCT116 tumor cell line. *Proc. Natl. Acad. Sci. U. S. A.*  
828 118: e2020187118 [[10.1073/pnas.2020187118](https://doi.org/10.1073/pnas.2020187118)].
- 829 27. Haber AL, Biton M, Rogel N, Herbst RH, Shekhar K, Smillie C, Burgin G,  
830 Delorey TM, Howitt MR, Katz Y, et al. (2017) A single-cell survey of the small

- 831 intestinal epithelium. *Nature* 551: 333-339 [[10.1038/nature24489](https://doi.org/10.1038/nature24489)].
- 832 28. Hsiao JJ, Potter OG, Chu TW, and Yin H (2018) Improved LC/MS Methods for  
833 the Analysis of Metal-Sensitive Analytes Using Medronic Acid as a Mobile Phase  
834 Additive. *Anal. Chem.* 90: 9457-9464 [[10.1021/acs.analchem.8b02100](https://doi.org/10.1021/acs.analchem.8b02100)].
- 835 29. Huang da W, Sherman BT, and Lempicki RA (2009) Systematic and integrative  
836 analysis of large gene lists using DAVID bioinformatics resources. *Nat. Protoc.* 4:  
837 44-57 [[10.1038/nprot.2008.211](https://doi.org/10.1038/nprot.2008.211)].
- 838 30. Irvine RF, and Schell MJ (2001) Back in the water: the return of the inositol  
839 phosphates. *Nat. Rev. Mol. Cell Biol.* 2: 327-338 [[10.1038/35073015](https://doi.org/10.1038/35073015)].
- 840 31. Ito M, Fujii N, Wittwer C, Sasaki A, Tanaka M, Bittner T, Jessen HJ, Saiardi A,  
841 Takizawa S, and Nagata E (2018) Hydrophilic interaction liquid  
842 chromatography-tandem mass spectrometry for the quantitative analysis of  
843 mammalian-derived inositol poly/pyrophosphates. *J. Chromatogr. A* 1573: 87-97  
844 [[10.1016/j.chroma.2018.08.061](https://doi.org/10.1016/j.chroma.2018.08.061)].
- 845 32. Kim D, Paggi JM, Park C, Bennett C, and Salzberg SL (2018) Graph-based  
846 genome alignment and genotyping with HISAT2 and HISAT-genotype. *Nat.*  
847 *Biotech.* 37: 907-915 [[10.1038/s41587-019-0201-4](https://doi.org/10.1038/s41587-019-0201-4)]
- 848 33. Kim SM, Choi KY, Cho IH, Rhy JH, Kim SH, Park CS, Kim E, and Song WK  
849 (2009) Regulation of dendritic spine morphology by SPIN90, a novel Shank  
850 binding partner. *J. Neurochem.* 109: 1106-1117  
851 [[10.1111/j.1471-4159.2009.06039.x](https://doi.org/10.1111/j.1471-4159.2009.06039.x)]
- 852 34. Knoepfler PS, Cheng PF, and Eisenman RN (2002) N-myc is essential during  
853 neurogenesis for the rapid expansion of progenitor cell populations and the  
854 inhibition of neuronal differentiation. *Genes & Dev.* 16: 2699-2712

- 855 [\[10.1101/gad.1021202\]](https://doi.org/10.1101/gad.1021202)
- 856 35. Kolozsvari B, Firth S, and Saiardi A (2015) Raman spectroscopy detection of  
857 phytic acid in plant seeds reveals the absence of inorganic polyphosphate. *Mol.*  
858 *Plant.* 8: 826-828 [\[10.1016/j.molp.2015.01.015\]](https://doi.org/10.1016/j.molp.2015.01.015).
- 859 36. Laha D, Portela-Torres P, Desfougères Y, and Saiardi A (2021) Inositol phosphate  
860 kinases in the eukaryote landscape. *Adv. Biol. Regul.* 79: 100782  
861 [\[10.1016/j.jbior.2020.100782\]](https://doi.org/10.1016/j.jbior.2020.100782).
- 862 37. Lee S, Lee K, Hwang S, Kim SH, Song WK, Park ZY, and Chang S (2006)  
863 SPIN90/WISH interacts with PSD-95 and regulates dendritic spinogenesis via an  
864 N-WASP-independent mechanism. *EMBO J.* 25: 4983-4995  
865 [\[10.1038/sj.emboj.7601349\]](https://doi.org/10.1038/sj.emboj.7601349)
- 866 38. Li X, Gu C, Hostachy S, Sahu S, Wittwer C, Jessen HJ, Fiedler D, Wang H, and  
867 Shears SB (2020) Control of XPR1-dependent cellular phosphate efflux by InsP8  
868 is an exemplar for functionally-exclusive inositol pyrophosphate signaling. *Proc.*  
869 *Natl. Acad. Sci. U. S. A.* 117: 3568-3574 [\[10.1073/pnas.1908830117\]](https://doi.org/10.1073/pnas.1908830117).
- 870 39. Liberzon A, Birger C, Thorvaldsdóttir H, Ghandi M, Mesirov JP, and Tamayo P  
871 (2015) The Molecular Signatures Database (MSigDB) hallmark gene set collection.  
872 *Cell Syst.* 1: 417-425 [\[10.1016/j.cels.2015.12.004\]](https://doi.org/10.1016/j.cels.2015.12.004)
- 873 40. Liu X, Villalta PW, and Sturla SJ (2009) Simultaneous determination of inositol  
874 and inositol phosphates in complex biological matrices: quantitative ion-exchange  
875 chromatography/tandem mass spectrometry. *Rapid Commun. Mass Spectrom.* 23:  
876 705-712 [\[10.1002/rcm.3923\]](https://doi.org/10.1002/rcm.3923).
- 877 41. López-Sánchez U, Tury S, Nicolas G, Wilson MS, Jurici S, Ayrignac X,  
878 Courgnaud V, Saiardi A, Sitbon M, and Battini JL (2020) Interplay between

- 879 primary familial brain calcification-associated SLC20A2 and XPR1 phosphate  
880 transporters requires inositol polyphosphates for control of cellular phosphate  
881 homeostasis. *J. Biol. Chem.* 295: 9366-9378 [[10.1074/jbc.RA119.011376](https://doi.org/10.1074/jbc.RA119.011376)].
- 882 42. Losito O, Szijgyarto Z, Resnick AC, and Saiardi A (2009) Inositol pyrophosphates  
883 and their unique metabolic complexity: analysis by gel electrophoresis. *PLoS One*  
884 4: e5580 [[10.1371/journal.pone.0005580](https://doi.org/10.1371/journal.pone.0005580)].
- 885 43. La Manno G, Gyllborg D, Codeluppi S, Nishimura K, Salto C, Zeisel A, Borm L,  
886 Stott SRW, Toledo EM, Villaescusa JC, et al. (2016) Molecular diversity of  
887 midbrain development in mouse, human, and stem cells. *Cell* 167: 566-580  
888 [[10.1016/j.cell.2016.09.027](https://doi.org/10.1016/j.cell.2016.09.027)].
- 889 44. Menniti FS, Miller RN, Putney JW Jr, and Shears SB (1993) Turnover of inositol  
890 polyphosphate pyrophosphates in pancreatoma cells. *J. Biol. Chem.* 268:  
891 3850-3856 [[10.1016/S0021-9258\(18\)53551-1](https://doi.org/10.1016/S0021-9258(18)53551-1)].
- 892 45. Morarach K, Mikhailova A, Knoflach V, Memic F, Kumar R, Li W, Ernfors P, and  
893 Marklund U (2021) Diversification of molecularly defined myenteric neuron  
894 classes revealed by single-cell RNA sequencing. *Nat. Neurosci.* 24: 34-46  
895 [[10.1038/s41593-020-00736-x](https://doi.org/10.1038/s41593-020-00736-x)].
- 896 46. Moritoh Y, Oka M, Yasuhara Y, Hozumi H, Iwachidow K, Fuse H, and Tozawa R  
897 (2016) Inositol Hexakisphosphate Kinase 3 Regulates Metabolism and Lifespan in  
898 Mice. *Sci. Rep.* 6: 32072 [[10.1038/srep32072](https://doi.org/10.1038/srep32072)].
- 899 47. Musshoff F, Klotzbach H, Block W, Traeber F, Schild H, and Madea B (2011)  
900 Comparison of post-mortem metabolic changes in sheep brain tissue in isolated  
901 heads and whole animals using <sup>1</sup>H-MR spectroscopy--preliminary results. *Int. J.*  
902 *Legal Med.* 125: 741-744 [[10.1007/s00414-010-0463-3](https://doi.org/10.1007/s00414-010-0463-3)].

- 903 48. Nagata E, Nonaka T, Moriya Y, Fujii N, Okada Y, Tsukamoto H, Itoh J, Okada C,  
904 Satoh T, Arai T, et al. (2016) Inositol Hexakisphosphate Kinase 2 Promotes Cell  
905 Death in Cells with Cytoplasmic TDP-43 Aggregation. *Mol. Neurobiol.* 53:  
906 5377-5383 [[10.1007/s12035-015-9470-1](https://doi.org/10.1007/s12035-015-9470-1)].
- 907 49. Nagata E, Saiardi A, Tsukamoto H, Okada Y, Itoh Y, Satoh T, Itoh J, Margolis RL,  
908 Takizawa S, Sawa A, et al. (2011) Inositol hexakisphosphate kinases induce cell  
909 death in Huntington disease. *J. Biol. Chem.* 286: 26680-26686  
910 [[10.1074/jbc.M111.220749](https://doi.org/10.1074/jbc.M111.220749)].
- 911 50. Nagpal L, Fu C, and Snyder SH (2018) Inositol Hexakisphosphate Kinase-2 in  
912 Cerebellar Granule Cells Regulates Purkinje Cells and Motor Coordination via  
913 Protein 4.1N. *J. Neurosci.* 38: 7409-7419 [[10.1523/JNEUROSCI.1165-18.2018](https://doi.org/10.1523/JNEUROSCI.1165-18.2018)].
- 914 51. Nagpal L, Kornberg MD, Albacarys LK, and Snyder SH (2021) Inositol  
915 hexakisphosphate kinase-2 determines cellular energy dynamics by regulating  
916 creatine kinase-B. *Proc. Natl. Acad. Sci. U. S. A.* 118: e2020695118  
917 [[10.1073/pnas.2020695118](https://doi.org/10.1073/pnas.2020695118)].
- 918 52. Norbis F, Boll M, Stange G, Markovich D, Verrey F, Biber J, and Murer H (1997)  
919 Identification of a cDNA/protein leading to an increased Pi-uptake in *Xenopus*  
920 *laevis* oocytes. *J. Membr. Biol.* 156: 19-24 [[10.1007/s002329900183](https://doi.org/10.1007/s002329900183)].
- 921 53. Park SE, Lee D, Jeong JW, Lee SY, Park SJ, Ryu J, Oh SK, Yang H, Fang S, and  
922 Kim S (2022) Gut epithelial inositol polyphosphate multikinase alleviates  
923 experimental colitis via governing tuft cell homeostasis. *Cell Mol. Gastroenterol.*  
924 *Hepatol.* S2352-345X(22)00182-5. [[10.1016/j.jcmgh.2022.08.004](https://doi.org/10.1016/j.jcmgh.2022.08.004)]
- 925 54. Pavlovic I, Thakor DT, Vargas JR, McKinlay CJ, Hauke S, Anstaett P, Camuña RC,  
926 Bigler L, Gasser G, Schultz C, et al. (2016) Cellular delivery and photochemical

- 927 release of a caged inositol-pyrophosphate induces PH-domain translocation in  
928 cellulo. *Nat. Commun.* 7: 10622 [[10.1038/ncomms10622](https://doi.org/10.1038/ncomms10622)].
- 929 55. Pittner S, Ehrenfellner B, Monticelli FC, Zissler A, Sanger AM, Stoiber W, and  
930 Steinbacher P (2016) Postmortem muscle protein degradation in humans as a tool  
931 for PMI delimitation. *Int. J. Legal Med.* 130: 1547-1555  
932 [[10.1007/s00414-016-1349-9](https://doi.org/10.1007/s00414-016-1349-9)].
- 933 56. Priyodip P, Prakash PY, and Balaji S (2017) Phytases of Probiotic Bacteria:  
934 Characteristics and Beneficial Aspects. *Indian J. Microbiol.* 57: 148-154  
935 [[10.1007/s12088-017-0647-3](https://doi.org/10.1007/s12088-017-0647-3)].
- 936 57. Qiu D, Wilson MS, Eisenbeis VB, Harmel RK, Riemer E, Haas TM, Wittwer C,  
937 Jork N, Gu C, Shears SB, et al. (2020) Analysis of inositol phosphate metabolism  
938 by capillary electrophoresis electrospray ionization mass spectrometry. *Nat.*  
939 *Commun.* 11: 6035 [[10.1038/s41467-020-19928-x](https://doi.org/10.1038/s41467-020-19928-x)].
- 940 58. Rao F, Cha J, Xu J, Hu R, Vandiver MS, Tyagi R, Tokhunts R, Koldobski MA, Fu  
941 C, Barrow R, et al. (2014) Inositol pyrophosphates mediate the DNA-PK/ATM-p53  
942 cell death pathway by regulating CK2 phosphorylation of Tti1/Tel2. *Mol. Cell* 54:  
943 119-132 [[10.1016/j.molcel.2014.02.020](https://doi.org/10.1016/j.molcel.2014.02.020)].
- 944 59. Rao F, Xu J, Fu C, Cha JY, Gadalla MM, Xu R, Barrow JC, and Snyder SH (2015)  
945 Inositol pyrophosphates promote tumor growth and metastasis by antagonizing  
946 liver kinase B1. *Proc. Natl. Acad. Sci. U. S. A.* 112: 1773-1778  
947 [[10.1073/pnas.1424642112](https://doi.org/10.1073/pnas.1424642112)].
- 948 60. Rao M, and Gershon MD (2018) Enteric nervous system development: what could  
949 possibly go wrong? *Nat. Rev. Neurosci.* 19: 552-565.  
950 [[10.1038/s41583-018-0041-0](https://doi.org/10.1038/s41583-018-0041-0)]

- 951 61. Ried MK, Wild R, Zhu J, Pipercevic J, Sturm K, Broger L, Harmel RK, Abriata  
952 LA, Hothorn LA, Fiedler D, et al. (2021) Inositol pyrophosphates promote the  
953 interaction of SPX domains with the coiled-coil motif of PHR transcription factors  
954 to regulate plant phosphate homeostasis. *Nat. Commun.* 12: 384-020-20681-4  
955 [[10.1038/s41467-020-20681-4](https://doi.org/10.1038/s41467-020-20681-4)].
- 956 62. Riemer E, Qiu D, Laha D, Harmel RK, Gaugler P, Gaugler V, Frei M, Hajirezaei  
957 MR, Laha NP, Krusenbaum L, et al. (2021) ITPK1 is an InsP<sub>6</sub>/ADP  
958 phosphotransferase that controls phosphate signaling in Arabidopsis. *Mol. Plant.*  
959 14: 1864-1880 [[10.1016/j.molp.2021.07.011](https://doi.org/10.1016/j.molp.2021.07.011)].
- 960 63. Robert C, and Watson M (2015) Errors in RNA-Seq quantification affect genes of  
961 relevance to human disease. *Genome Biol.* 16: 177 [[10.1186/s13059-015-0734-x](https://doi.org/10.1186/s13059-015-0734-x)]
- 962 64. Sakamoto K, Vucenik I, and Shamsuddin AM (1993) [<sup>3</sup>H]phytic acid (inositol  
963 hexaphosphate) is absorbed and distributed to various tissues in rats. *J. Nutr.* 123:  
964 713-720 [[10.1093/jn/123.4.713](https://doi.org/10.1093/jn/123.4.713)].
- 965 65. Sahu S, Wang Z, Jiao X, Gu C, Jork N, Wittwer C, Li X, Hostachy S, Fiedler D,  
966 Wang H, et al. (2020) InsP<sub>7</sub> is a small-molecule regulator of NUDT3-mediated  
967 mRNA decapping and processing-body dynamics. *Proc. Natl. Acad. Sci. U. S. A.*  
968 117: 19245-19253 [[10.1073/pnas.1922284117](https://doi.org/10.1073/pnas.1922284117)].
- 969 66. Saiardi A (2012) How inositol pyrophosphates control cellular phosphate  
970 homeostasis? *Adv. Biol. Regul.* 52: 351-359 [[10.1016/j.jbior.2012.03.002](https://doi.org/10.1016/j.jbior.2012.03.002)].
- 971 67. Saiardi A, Erdjument-Bromage H, Snowman AM, Tempst P, and Snyder SH  
972 (1999) Synthesis of diphosphoinositol pentakisphosphate by a newly identified  
973 family of higher inositol polyphosphate kinases. *Curr. Biol.* 9: 1323-1326  
974 [[10.1016/s0960-9822\(00\)80055-x](https://doi.org/10.1016/s0960-9822(00)80055-x)].



- 975 68. Saiardi A, Nagata E, Luo HR, Snowman AM, and Snyder SH (2001) Identification  
976 and characterization of a novel inositol hexakisphosphate kinase. *J. Biol. Chem.*  
977 276: 39179-39185 [[10.1074/jbc.M106842200](https://doi.org/10.1074/jbc.M106842200)]
- 978 69. Sarmah B, and Wente SR (2010) Inositol hexakisphosphate kinase-2 acts as an  
979 effector of the vertebrate Hedgehog pathway. *Proc. Natl. Acad. Sci. U. S. A.* 107:  
980 19921-19926 [[10.1073/pnas.1007256107](https://doi.org/10.1073/pnas.1007256107)].
- 981 70. Schell MJ, Letcher AJ, Brearley CA, Biber J, Murer H, and Irvine RF (1999) PiUS  
982 (Pi uptake stimulator) is an inositol hexakisphosphate kinase. *FEBS Lett.* 461:  
983 169-172 [[10.1016/s0014-5793\(99\)01462-3](https://doi.org/10.1016/s0014-5793(99)01462-3)].
- 984 71. Schneider S (2015) Inositol transport proteins. *FEBS Lett.* 589: 1049-1058  
985 [[10.1016/j.febslet.2015.03.012](https://doi.org/10.1016/j.febslet.2015.03.012)].
- 986 72. Shah A, Ganguli S, Sen J, and Bhandari R (2017) Inositol Pyrophosphates:  
987 Energetic, Omnipresent and Versatile Signalling Molecules. *J. Indian Inst. Sci.* 97:  
988 23-40 [[10.1007/s41745-016-0011-3](https://doi.org/10.1007/s41745-016-0011-3)].
- 989 73. Shears SB (2015) Inositol pyrophosphates: why so many phosphates? *Adv. Biol.*  
990 *Regul.* 57: 203-216 [[10.1016/j.jbior.2014.09.015](https://doi.org/10.1016/j.jbior.2014.09.015)].
- 991 74. Shears SB (2016) Towards pharmacological intervention in inositol pyrophosphate  
992 signalling. *Biochem. Soc. Trans.* 44: 191-196 [[10.1042/BST20150184](https://doi.org/10.1042/BST20150184)].
- 993 75. Simões-Costa MS, McKeown SJ, Tan-Cabugao J, Sauka-Spengler T, and Bronner  
994 ME (2012) Dynamic and differential regulation of stem cell factor FoxD3 in the  
995 neural crest is encrypted in the genome. *PLoS Genet.* 8: e1003142  
996 [[10.1371/journal.pgen.1003142](https://doi.org/10.1371/journal.pgen.1003142)]
- 997 76. Smith TH, Ngwainmbi J, Grider JR, Dewey WL, and Akbarali HI (2013) An  
998 in-vitro preparation of isolated enteric neurons and glia from the myenteric plexus

- 999 of the adult mouse. *J. Vis. Exp.* 78: 50688 [[10.3791/50688](https://doi.org/10.3791/50688)].
- 1000 77. Subramanian A, Tamayo P, Mootha VK, Mukherjee S, Ebert BL, Gillette MA,  
1001 Paulovich A, Pomeroy SL, Golub TR, Lander ES, et al. (2005) Gene set  
1002 enrichment analysis: A knowledge-based approach for interpreting genome-wide  
1003 expression profiles. *Proc. Natl. Acad. Sci. U. S. A.* 102: 15545-15550  
1004 [[10.1073/pnas.0506580102](https://doi.org/10.1073/pnas.0506580102)]
- 1005 78. Sun J, Nishiyama T, Shimizu K, and Kadota K (2013) TCC: an R package for  
1006 comparing tag count data with robust normalization strategies. *BMC*  
1007 *Bioinformatics* 14: 219 [[10.1186/1471-2105-14-219](https://doi.org/10.1186/1471-2105-14-219)]
- 1008 79. Vera Alvarez R, Pongor LS, Mariño-Ramírez L, and Landsman D (2019)  
1009 TPMCalculator: one-step software to quantify mRNA abundance of genomic  
1010 features. *Bioinformatics* 35: 1960-1962 [[10.1093/bioinformatics/bty896](https://doi.org/10.1093/bioinformatics/bty896)]
- 1011 80. Vitelli F, Morishima M, Taddei I, Lindsay EA, and Baldini A (2002) Tbx1  
1012 mutation causes multiple cardiovascular defects and disrupts neural crest and  
1013 cranial nerve migratory pathways. *Hum. Mol. Genet.* 11: 915-922  
1014 [[10.1093/hmg/11.8.915](https://doi.org/10.1093/hmg/11.8.915)]
- 1015 81. Wilson MS, Bulley SJ, Pisani F, Irvine RF, and Saiardi A (2015) A novel method  
1016 for the purification of inositol phosphates from biological samples reveals that no  
1017 phytate is present in human plasma or urine. *Open Biol.* 5: 150014  
1018 [[10.1098/rsob.150014](https://doi.org/10.1098/rsob.150014)].
- 1019 82. Wilson MS, Jessen HJ, and Saiardi A (2019) The inositol hexakisphosphate  
1020 kinases IP6K1 and -2 regulate human cellular phosphate homeostasis, including  
1021 XPR1-mediated phosphate export. *J. Biol. Chem.* 294: 11597-11608  
1022 [[10.1074/jbc.RA119.007848](https://doi.org/10.1074/jbc.RA119.007848)].

- 1023 83. Wilson MS, Livermore TM, and Saiardi A (2013) Inositol pyrophosphates:  
1024 between signalling and metabolism. *Biochem. J.* 452: 369-379  
1025 [[10.1042/BJ20130118](https://doi.org/10.1042/BJ20130118)].
- 1026 84. World Medical Association (2013) World Medical Association Declaration of  
1027 Helsinki: ethical principles for medical research involving human subjects. *JAMA*  
1028 310: 2191-2194 [[10.1001/jama.2013.281053](https://doi.org/10.1001/jama.2013.281053)].
- 1029 85. Wright CM, Garifallou JP, Schneider S, Mentch H, Kothakapa DR, Maguire BA,  
1030 and Heuckeroth RO (2021) Dlx1/2 mice have abnormal enteric nervous system  
1031 function. *JCI insight* 5: e131494. [[10.1172/jci.insight.131494](https://doi.org/10.1172/jci.insight.131494)]
- 1032 86. Zhong S, Zhang S, Fan X, Wu Q, Yan L, Dong J, Zhang H, Li L, Sun L, Pan N, et  
1033 al. (2018) A single-cell RNA-seq survey of the developmental landscape of the  
1034 human prefrontal cortex. *Nature* 555: 524-528 [[10.1038/nature25980](https://doi.org/10.1038/nature25980)]  
1035  
1036

1037 **Figure titles and legends**

1038 **Figure 1. Refined HILIC-MS/MS analysis for IP<sub>6</sub> and PP-IPs**

1039 **A.** Effect of InfinityLab deactivator additive as a mobile phase modifier on SRM  
1040 chromatograms of IP<sub>6</sub> and IP<sub>7</sub> before and after biological sample injection. 100 pmol of  
1041 each synthetic analyte were injected.

1042 **B.** Effect of InfinityLab deactivator additive as a mobile phase modifier on the detection  
1043 of low amounts of synthetic PP-IP. 10 and 20 pmol of IP<sub>7</sub> standard were injected.

1044 **C.** Chemical structure of IP<sub>7</sub> and IP<sub>8</sub>.

1045 **D.** Product ion spectrum of IP<sub>8</sub> (singly deprotonated precursor, left panel; doubly  
1046 deprotonated precursor, right panel). Characteristic fragment ions generated by loss of  
1047 water (H<sub>2</sub>O, 18 Da) and phosphoric acid (H<sub>3</sub>PO<sub>4</sub>, 80 Da) are also shown.

1048 **E.** Gel electrophoretic results (left panel) and SRM chromatograms (right panel) of  
1049 synthetic IP<sub>6</sub>, IP<sub>7</sub>, and IP<sub>8</sub> standard. The PolyP ladder was used as an electrophoresis  
1050 standard. 500 pmol of each standard were injected for LC-MS.

1051 **F.** Representative SRM chromatograms of IP<sub>6</sub>, IP<sub>7</sub>, and IP<sub>8</sub> in untreated (left panel) and  
1052 NaF-treated (right panel) HCT116 cell samples. The three best transitions per molecule  
1053 are shown for the peak identification of each compound. Arrows indicate the SRM peak  
1054 of corresponding analytes.

1055

1056 **Figure 2. The mammalian gastrointestinal tract (GIT) contains high levels of**  
1057 **PP-IPs**

1058 **A-C.** The concentrations of IP<sub>6</sub> (**A**) and IP<sub>7</sub> (**B**) and IP<sub>7</sub>/IP<sub>6</sub> ratios (**C**) in the 15 organs of  
1059 standard diet-fed C57BL/6J mice. The values shown are expressed as pmol per mg of  
1060 organ weight (n = 4).

1061 **D.** Representative SRM chromatograms of IP<sub>7</sub> and IP<sub>8</sub> in stomach and small intestine  
1062 samples of standard diet-fed C57BL/6J mice. The three best transitions per molecule are  
1063 shown for the peak identification of each compound. The arrows indicate the SRM  
1064 peaks of the corresponding analytes.

1065 **E.** Representative SRM chromatograms of IP<sub>7</sub> in CNS samples of standard diet-fed  
1066 C57BL/6J mice.

1067 **F.** Photographs (left) and SRM chromatograms of IP<sub>6</sub>, IP<sub>7</sub>, and IP<sub>8</sub> (right) of standard  
1068 diet (CE-2) and the two different purified diets (iVid-neo and 70% casein).

1069 **G.** Relative concentrations of IP<sub>6</sub> and PP-IPs in the standard and purified diets. The  
1070 values shown represent the mean  $\pm$  standard deviation (SD) of three independent  
1071 experiments and are expressed relative to those of the standard diet. Asterisks indicate  
1072 statistical significance ( $P < 0.05$ , Student's *t*-test) compared with the standard diet.

1073 **H.** Representative SRM chromatograms of IP<sub>6</sub> and IP<sub>7</sub> in the feces of standard diet-fed  
1074 C57BL/6J mice.

1075 **I.** Relative concentrations of IP<sub>6</sub> and IP<sub>7</sub> in the feces of standard diet-fed C57BL/6J  
1076 mice. The values shown are expressed relative to those of the standard diet ( $n = 3$ ).  
1077 Asterisks indicate statistical significance ( $P < 0.05$ , Student's *t*-test) compared with  
1078 the standard diet.

1079 **J.** IP<sub>7</sub>/IP<sub>6</sub> ratio in standard diet and feces of standard diet-fed C57BL/6J mice ( $n = 3$ ).  
1080 n.s., not significant (Student's *t*-test).

1081

1082 **Figure 3. Enhanced IP<sub>7</sub> metabolism is retained in the proximal GIT of rodents**  
1083 **under conditions of depleted dietary IP<sub>6</sub> and PP-IP supply**

1084 **A.** Schematic illustration of the experimental workflow. C57BL/6J mice were fed a

1085 standard diet (n = 3) or purified diet (iVid-neo) for 2 months (n = 4) or fasted for 48 h (n  
1086 = 4).

1087 **B, C.** The concentrations of IP<sub>6</sub> (**B**) and IP<sub>7</sub> (**C**) in the CNS, testes, and GIT of  
1088 C57BL/6J mice under the three different conditions. The values shown are expressed as  
1089 pmol per mg of organ weight.

1090 **D.** Representative SRM chromatograms of IP<sub>7</sub> in the GIT of C57BL/6J mice fed with  
1091 purified diet (left panel) or under fasting conditions (right panel). Arrows indicate the  
1092 SRM peak of IP<sub>7</sub>.

1093 **E.** IP<sub>7</sub>/IP<sub>6</sub> ratios in the CNS, testes, and GIT of C57BL/6J mice under the three different  
1094 conditions. Asterisk indicates statistical significance ( $P \leq 0.05$ , one-way ANOVA,  
1095 Bonferroni-type post-hoc test) compared with the standard diet-fed mice.

1096 **F.** Graphical scheme of the experiment. Sprague–Dawley rats were fed a standard (n =  
1097 3) or purified diet (70% casein) for 1 month (n = 3).

1098 **G-I.** Concentrations of IP<sub>6</sub> (**G**), IP<sub>7</sub> (**H**) and IP<sub>7</sub>/IP<sub>6</sub> ratios (**I**) in the CNS, testes, and GIT  
1099 of the rats under the two different conditions. The values shown are expressed as pmol  
1100 per mg of organ weight.

1101

#### 1102 **Figure 4. Enteric neurons highly express IP6K2 in the mammalian GIT**

1103 **A.** Expression analysis of IP6K1-3 in intestinal cell subsets using publicly available  
1104 scRNA-seq datasets. Relative expression (log scale) of IP6K1-3 among human  
1105 embryonic enteric cells (left) and their neural cell subsets (right), obtained by analysis  
1106 of human embryonic intestinal cells scRNA-seq datasets are shown (Fawkner-Corbett et  
1107 al, 2021). The size and color of the dots represent the percentage of cells which express  
1108 IP6K1-3 mRNA and their average abundances within a cluster, respectively.

1109 **B.** UMAP-based unsupervised clustering of recently reported mouse embryonic (E18.5)  
1110 ENS data (Morarach et al, 2021) (upper panel). Assignment of cell identities was based  
1111 on the expression of signature genes as described in the literature: *Sox10* (Progenitor),  
1112 *Ascl1* (Neuroblast), *Elavl4* (Neuron), *Plp1* (Enteric glia) and *Dhh* (SCP). Relative  
1113 expression (log scale) of IP6K1-3 among the ENS clusters (lower panel) are shown.  
1114 ENS, enteric nervous system; SCP, Schwann cell precursor; E, embryonic day; UMAP,  
1115 uniform manifold approximation and projection.

1116 **C.** Immunohistochemical analysis of IP6K2 expression in the duodenal muscularis  
1117 externa of C57BL/6J mice. Three different areas of confocal microscopy images are  
1118 shown. The neuronal marker HuC/D was also detected to identify enteric neurons in the  
1119 myenteric plexuses. Open arrowheads indicate double-positive cells. DIC images were  
1120 overlaid onto the respective merged fluorescent images to identify cell contours. DIC,  
1121 differential interference contrast. Scale bar = 10  $\mu$ m.

1122

1123 **Figure 5. *IP6K2*<sup>-/-</sup> mice show significant impairment of IP<sub>7</sub> metabolism in the**  
1124 **proximal GIT**

1125 **A.** Schematic depiction of the *IP6K2* genomic locus in *IP6K2*<sup>-/-</sup> and WT mice (upper  
1126 panel) and the experimental workflow (lower panel). IP6K2 exons and introns are  
1127 represented as boxes and lines, respectively.

1128 **B.** IP6K2 mRNA levels in the CNS and GIT of *IP6K2*<sup>-/-</sup> and WT mice (upper left panel).  
1129 The values shown are normalized with 18S rRNA level and expressed as copies per  $\mu$ g  
1130 RNA (n = 3). Electrophoretic gel images of qPCR products (lower left panel) and PCR  
1131 primer location in the *IP6K2* genomic locus (right panel) was also depicted. W, WT; K,  
1132 *IP6K2*<sup>-/-</sup>; n.d., not detected; \*, non-specific band.

1133 **C.** Representative Western blot image of IP6K1 and IP6K2 expression in the cerebrum  
1134 of *IP6K2*<sup>-/-</sup> and WT mice.  $\beta$ -actin was used as the internal control.

1135 **D-F.** The concentrations of IP<sub>6</sub> (**D**) and IP<sub>7</sub> (**E**), and IP<sub>7</sub>/IP<sub>6</sub> ratios (**F**) in the CNS, GIT,  
1136 and other organs of *IP6K2*<sup>-/-</sup> and WT mice. The values shown represent the  
1137 mean  $\pm$  SD of five independent experiments and are expressed as pmol per mg of  
1138 organ weight. Asterisks indicate statistical significance ( $P < 0.05$ , Student's *t*-test)  
1139 compared with WT mice.

1140 **G, H.** Representative SRM chromatograms of IP<sub>6</sub> (upper panel) and IP<sub>7</sub> (lower panel) in  
1141 the stomach (**G**) and duodenum (**H**) of *IP6K2*<sup>-/-</sup> and WT mice. The three best transitions  
1142 per molecule are shown for peak identification of each compound. Arrows indicate the  
1143 SRM peak of each analyte.

1144

1145 **Figure 6. IP6K2-dependent enhanced IP<sub>7</sub> metabolism exists in the gut and**  
1146 **duodenal muscularis externa where the myenteric plexus is located**

1147 **A.** Schematic illustration of the experimental workflow. C57BL/6J mice were fed a  
1148 standard diet, or fasted for 48 h. These mice were sacrificed to collect four stomach and  
1149 3 consecutive 5-cm segments of the proximal GIT (duodenum, jejunum, ileum). The  
1150 muscularis externa containing myenteric plexus as well as total tissues in the proximal  
1151 GITs were subjected to HILIC-MS/MS analysis.

1152 **B-D.** The concentrations of IP<sub>6</sub> (**B**), IP<sub>7</sub> (**C**), and IP<sub>7</sub>/IP<sub>6</sub> ratios (**D**) in the muscularis  
1153 externa and total tissue of four proximal GIT segments of C57BL/6J mice under the two  
1154 different conditions. The values shown represent the mean  $\pm$  SD of four independent  
1155 experiments and are expressed as pmol per mg of organ weight.

1156 **E.** Whole mount immunostaining of WT and *IP6K2*<sup>-/-</sup> duodenal muscularis externa



1157 using anti-neuronal markers antibodies. Two different areas of confocal microscopic  
1158 images of each neuron marker are shown. The neuronal markers HuC/D and  
1159  $\beta$ III-tubulin were detected to identify enteric neuronal somas and enteric nerve fibers in  
1160 the myenteric plexuses, respectively. Scale bar = 50  $\mu$ m.

1161 **F.** The concentration of enteric neurons in WT and *IP6K2*<sup>-/-</sup> duodenal muscularis externa.  
1162 The values shown represent the mean  $\pm$  SD of three independent experiments and are  
1163 expressed relative to those of WT mice. n.s., not significant (Student's *t*-test).

1164 **G.** Schematic illustration of the experimental workflow. *IP6K2*<sup>-/-</sup> and WT mice fasted  
1165 for 48 h were sacrificed to collect four proximal GIT segments (stomach, duodenum,  
1166 jejunum, ileum), which were then subjected to isolate muscularis externa.

1167 **H-J.** The abundances of IP<sub>6</sub> (**H**) and IP<sub>7</sub> (**I**), and IP<sub>7</sub>/IP<sub>6</sub> ratios (**J**) in the muscularis  
1168 externa of the four GIT segments of *IP6K2*<sup>-/-</sup> and WT mice. The values shown represent  
1169 the mean  $\pm$  SD of four independent experiments and are expressed relative to those  
1170 for WT mice. Asterisks indicate statistical significance ( $P < 0.05$ , Student's *t*-test)  
1171 compared with WT mice.

1172

1173 **Figure 7. IP6K2-IP<sub>7</sub> axis is crucial for certain neurotranscriptome profile**  
1174 **associating with ENS development and functioning**

1175 **A.** Transcript levels of two different neuronal genes (*Ddr5* and *Cckbr*) in the CNS and  
1176 GIT of *IP6K2*<sup>-/-</sup> and WT mice. Data were normalized to 18S rRNA level. The values  
1177 shown represent the mean  $\pm$  SD of three (CNS of *IP6K2*<sup>-/-</sup>, and CNS and GIT of WT  
1178 mice) and five (GIT of *IP6K2*<sup>-/-</sup> mice) independent experiments and are expressed  
1179 relative to those of WT mice. Asterisks indicate statistical significance ( $P < 0.05$ ,  
1180 Student's *t*-test) compared with WT mice.

1181 **B.** Schematic illustration of the experimental workflow. *IP6K2*<sup>-/-</sup> and WT mice were  
1182 sacrificed to collect the duodenal muscularis externa. High-quality total RNAs isolated  
1183 from these tissues (each n =3) were subjected to whole transcriptome analysis by  
1184 high-throughput RNA sequencing.

1185 **C.** Gene Set Enrichment Analysis (GSEA) of the enriched gene signature in *IP6K2*<sup>-/-</sup>  
1186 duodenal muscularis externa. Cell type signature gene sets (C8 in The Molecular  
1187 Signatures Database ver7.5.1; <http://www.gsea-msigdb.org/gsea/msigdb/index.jsp>) were  
1188 used for this analysis. Horizontal dashed line indicates nominal P-value 0.05, and  
1189 vertical lines indicate normalized enriched score (NES)  $\pm$  1.2 cutoff. Gene sets  
1190 assigned to neural progenitor cells and oligodendrocyte progenitor cells (source data is  
1191 derived from Zhong et al, 2018), neural stem cells and glial cells (Fan et al, 2018), and  
1192 mature neurons (inhibitory neurons, Cao et al, 2020; GABAergic and dopaminergic  
1193 neurons, La Manno et al, 2016) with nominal P < 0.05 and NES > 1.2 or < -1.2 are  
1194 labeled in colored dots.

1195 **D.** Representative GSEA plots of the gene sets enriched among up-regulated (inhibitory  
1196 neurons, GABAergic neurons, dopaminergic neurons) or down-regulated (neural  
1197 progenitor cells, neural stem cells, glial cells) genes by genetic ablation of *IP6K2* in the  
1198 duodenal muscularis externa.

1199 **E.** Normalized expression levels (transcripts per million, TPM) from RNA-seq data for  
1200 7 neuronal genes prominently and significantly (P < 0.05, Student's *t*-test) accumulated  
1201 or depleted in *IP6K2*<sup>-/-</sup> duodenal muscularis externa compared with WT counterparts (n  
1202 = 3).

1203 **F.** Validation of RNA-seq results by qPCR. Data were normalized to  $\beta$ -actin level. The  
1204 values shown represent the mean  $\pm$  SD of six independent experiments and are

1205 expressed relative to those for WT mice. Asterisks indicate statistical significance

1206 ( $P < 0.05$ , Student's *t*-test) compared with WT mice.

1207 **G.** Transcript levels of three different neuronal genes (*Ddr5*, *Cckbr* and *Npy4r*) in the

1208 duodenal muscularis externa of *IP6K2*<sup>-/-</sup> and WT mice. Data were normalized to  $\beta$ -actin

1209 level. The values shown represent the mean  $\pm$  SD of six independent experiments and

1210 are expressed relative to those for WT mice. Asterisks indicate statistical significance

1211 ( $P < 0.05$ , Student's *t*-test) compared with WT mice.

1212

1213

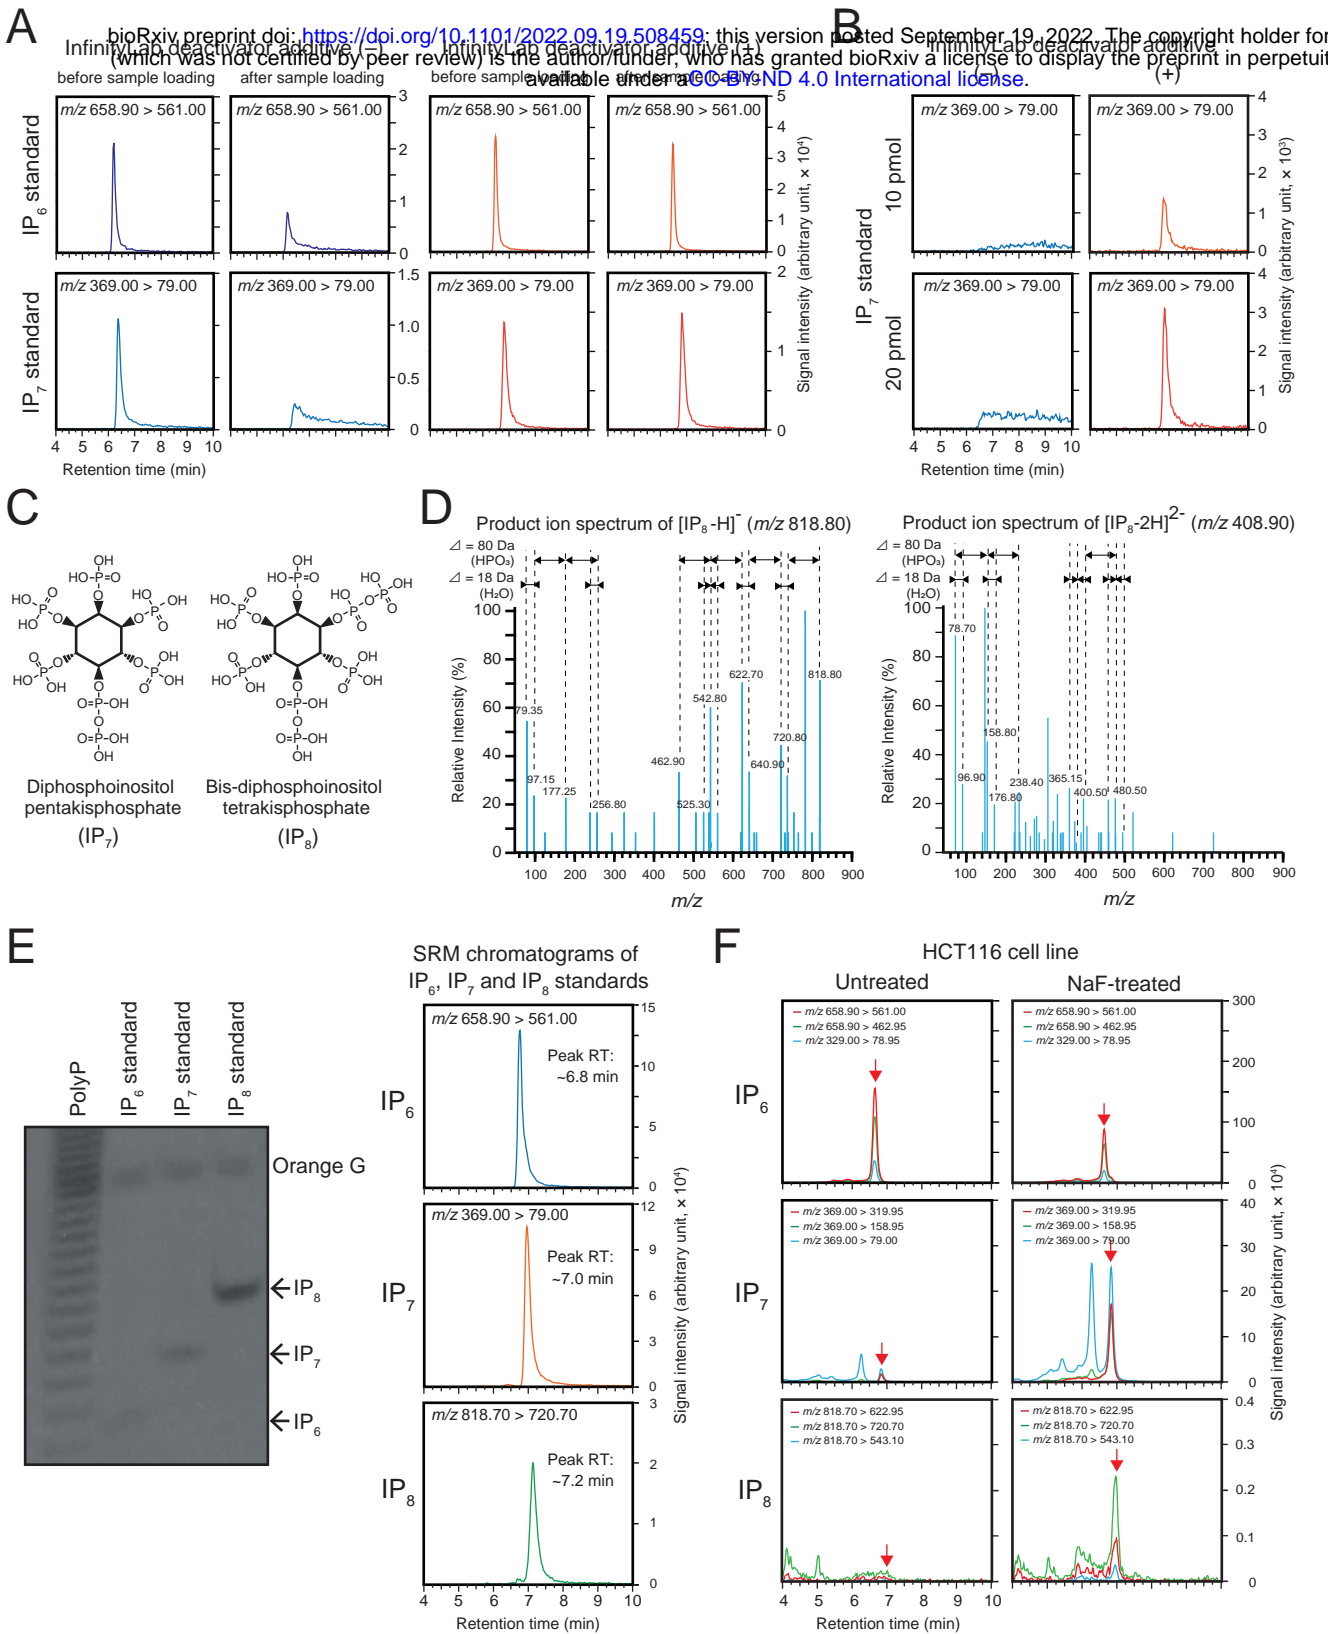

Fig 1. Ito et al.

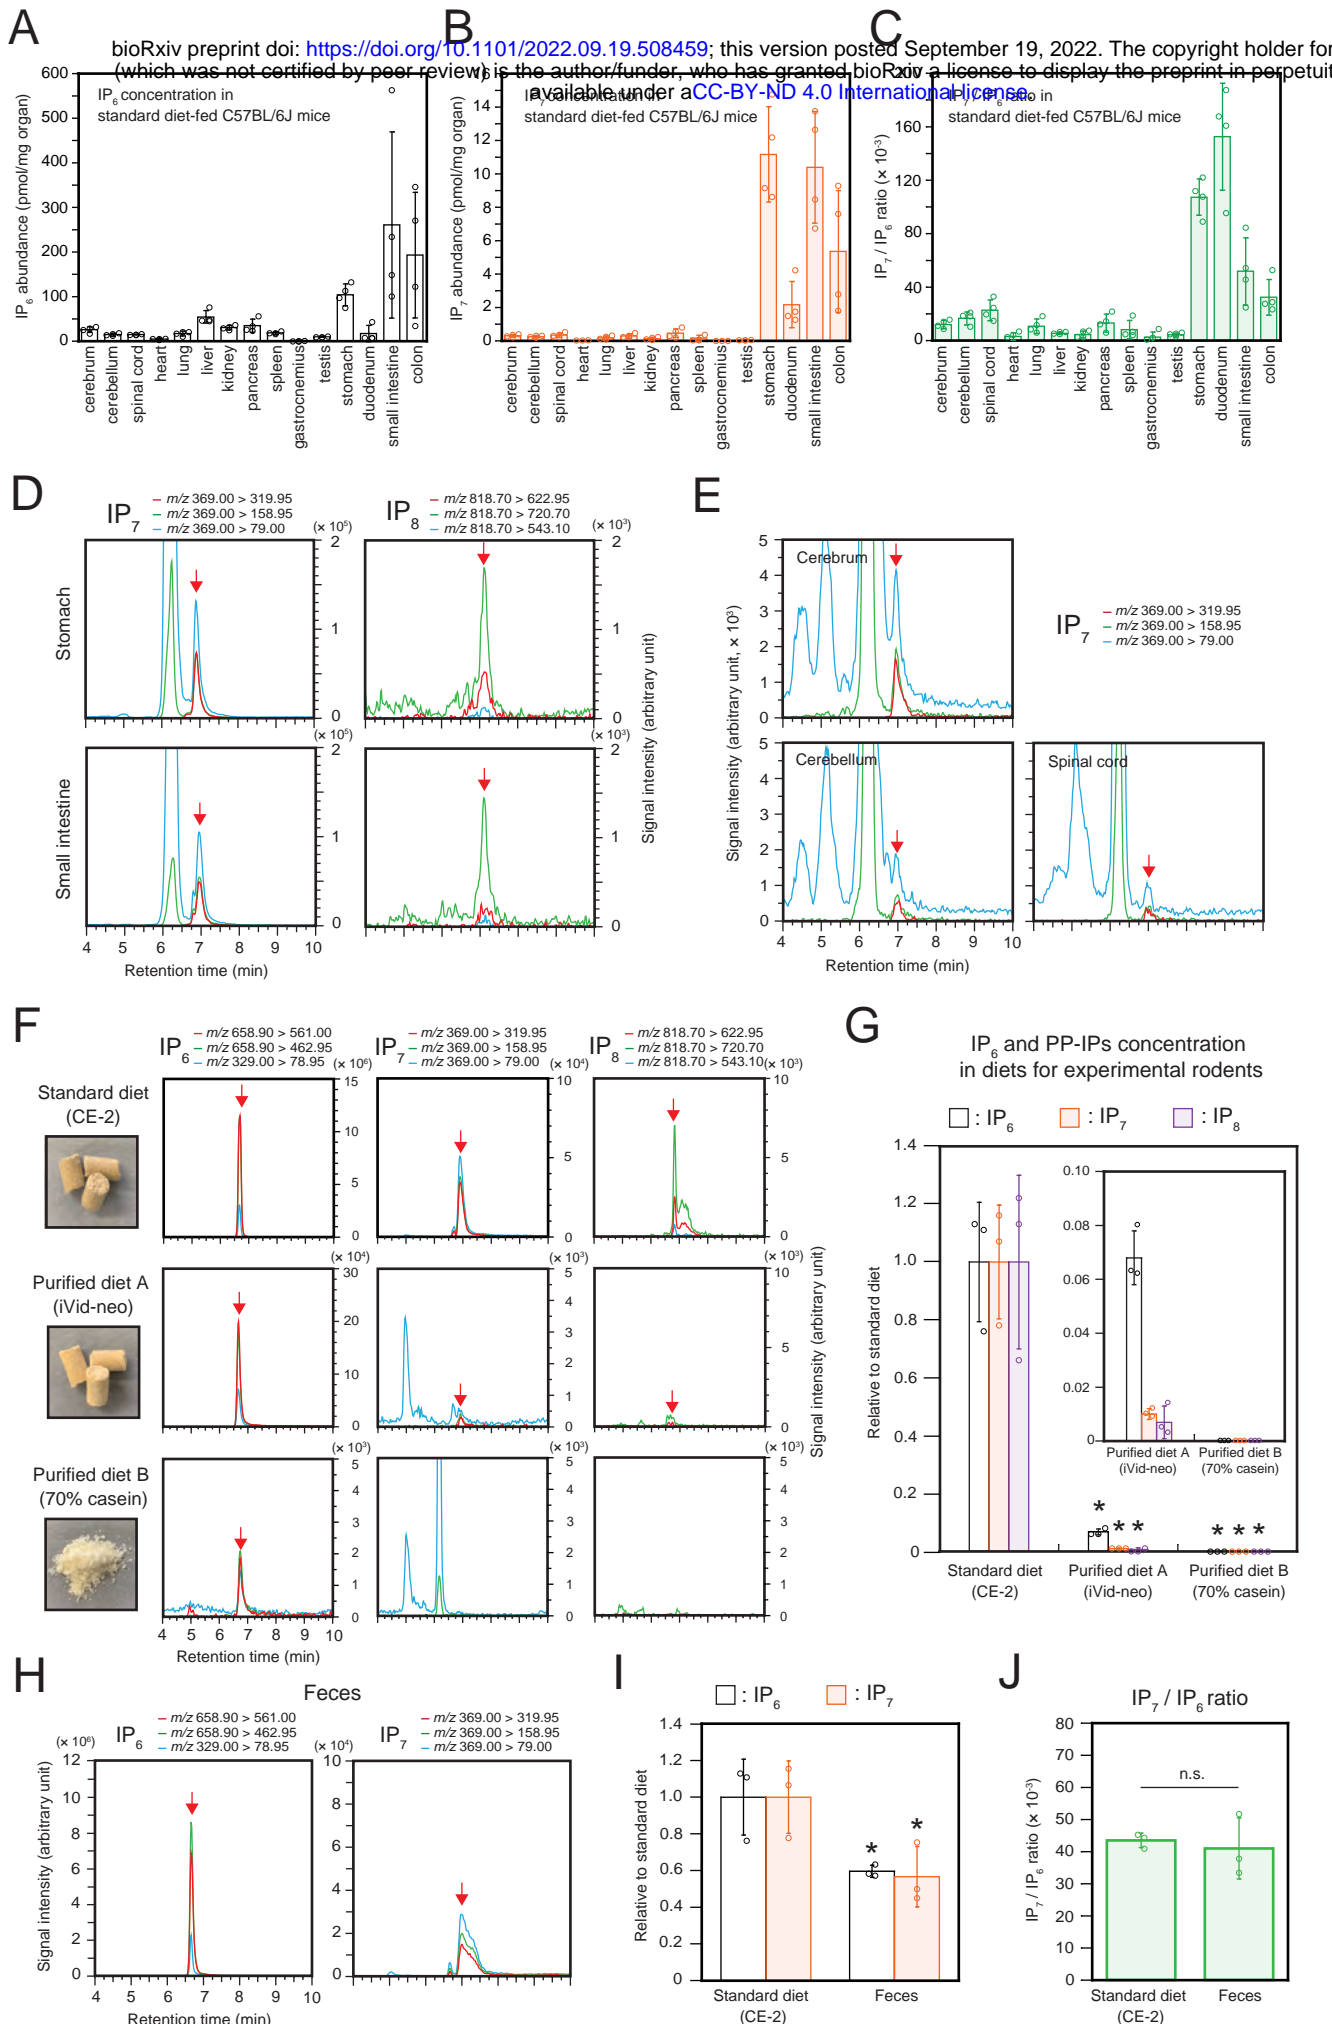

Fig 2. Ito et al.

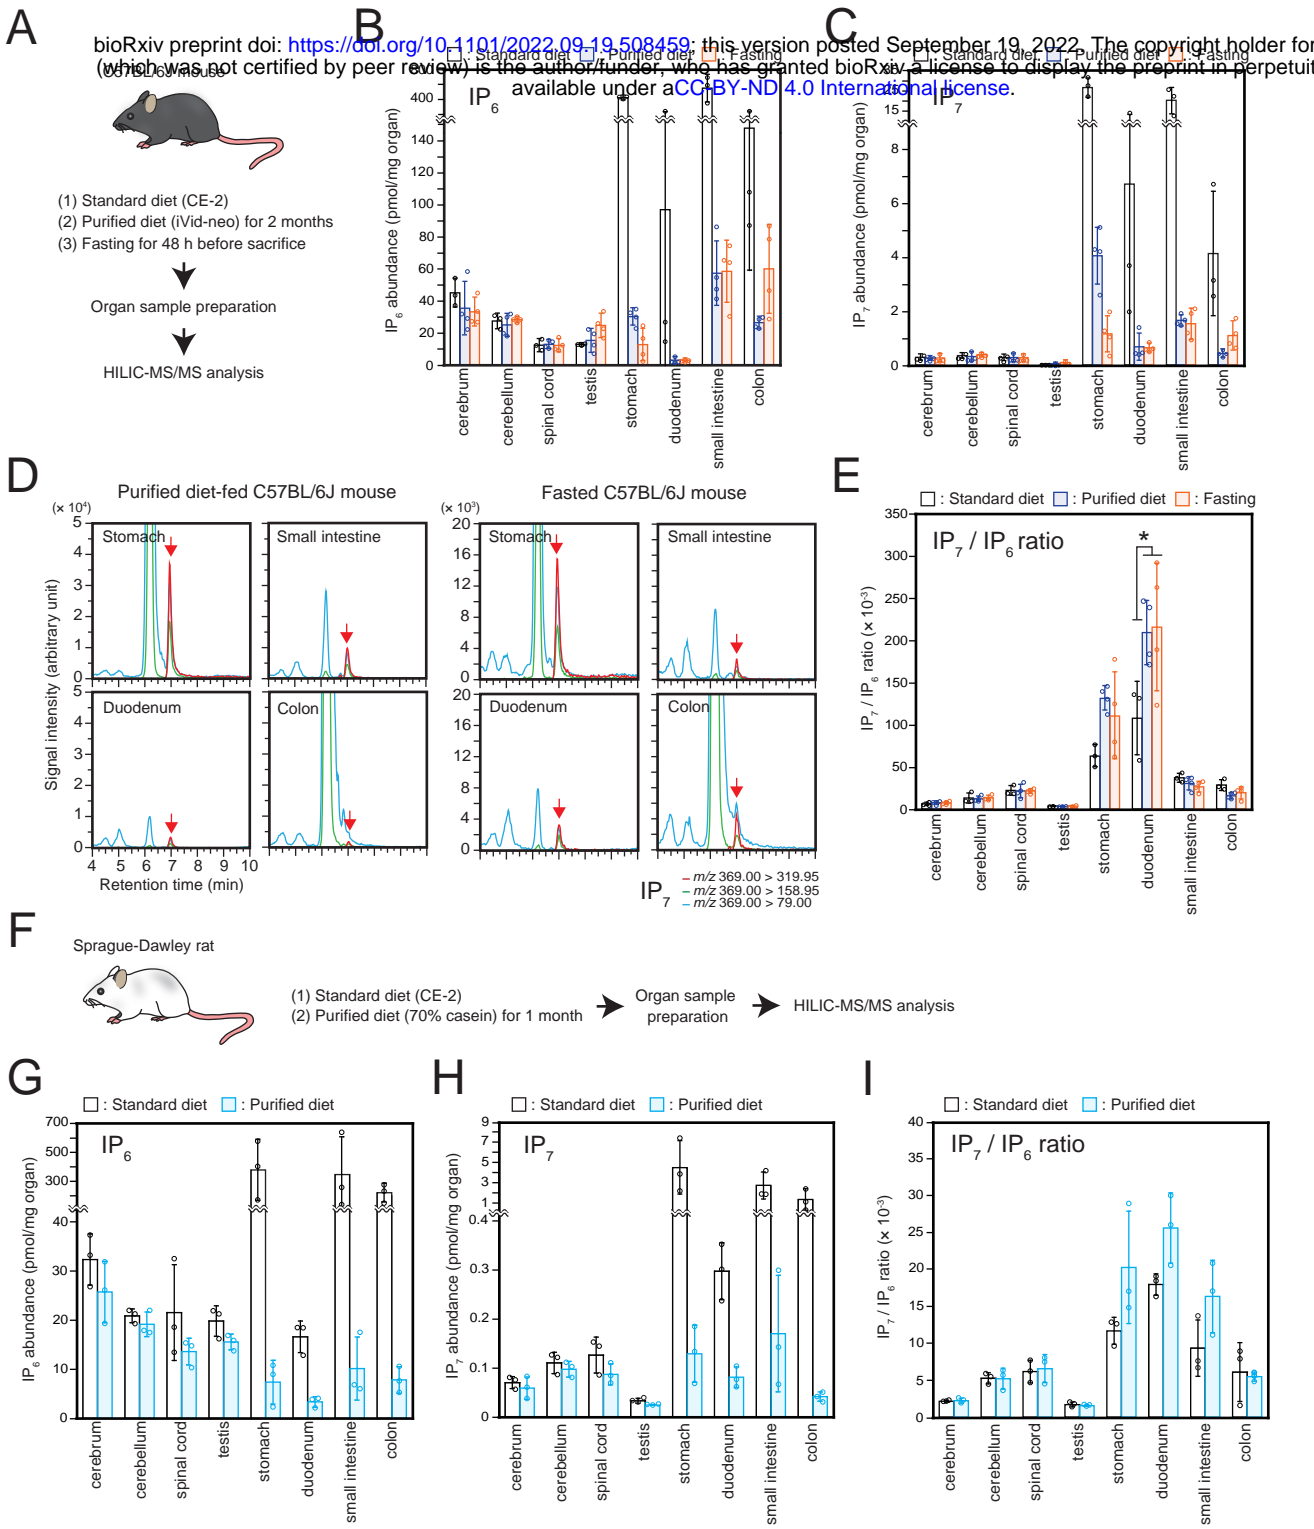

Fig 3. Ito et al.

A

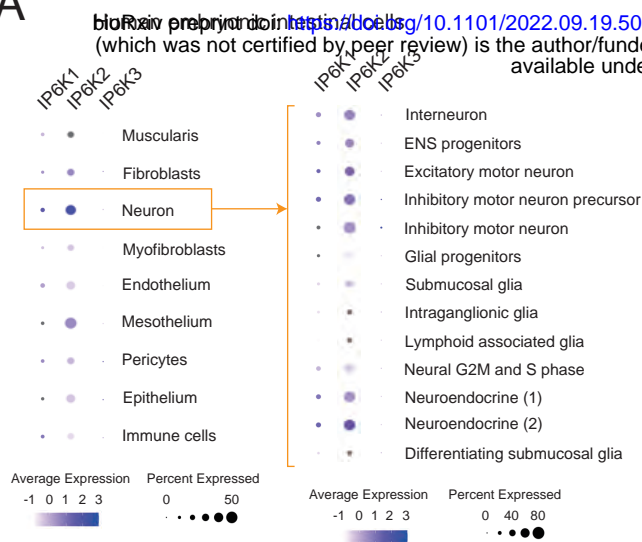

B

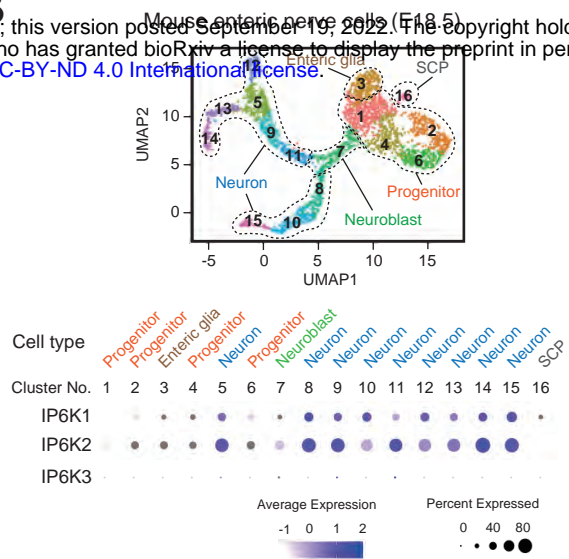

C

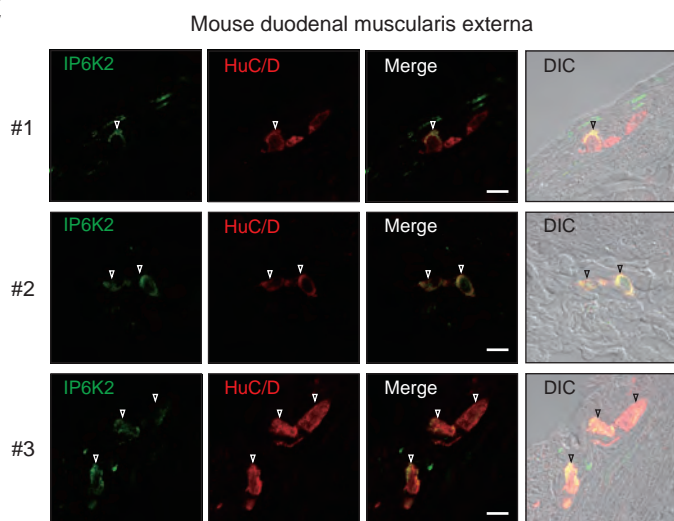

Fig 4. Ito et al.

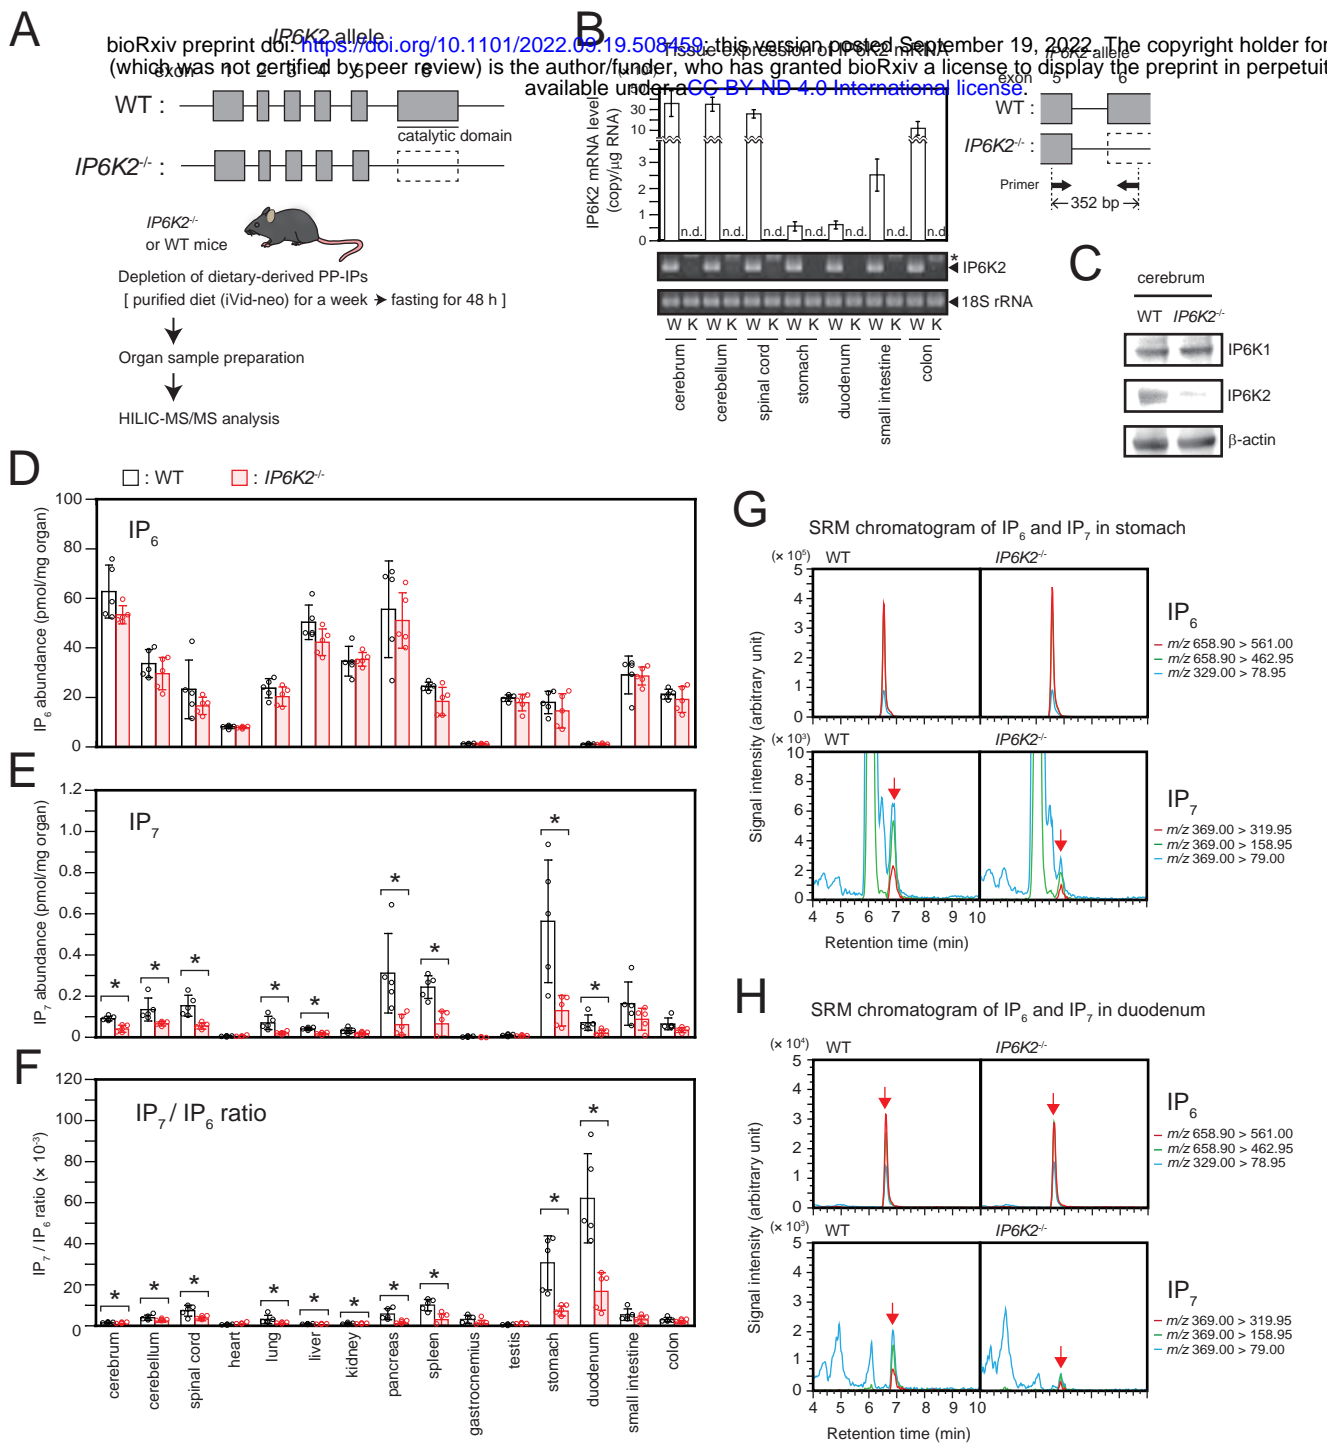

Fig 5. Ito et al.



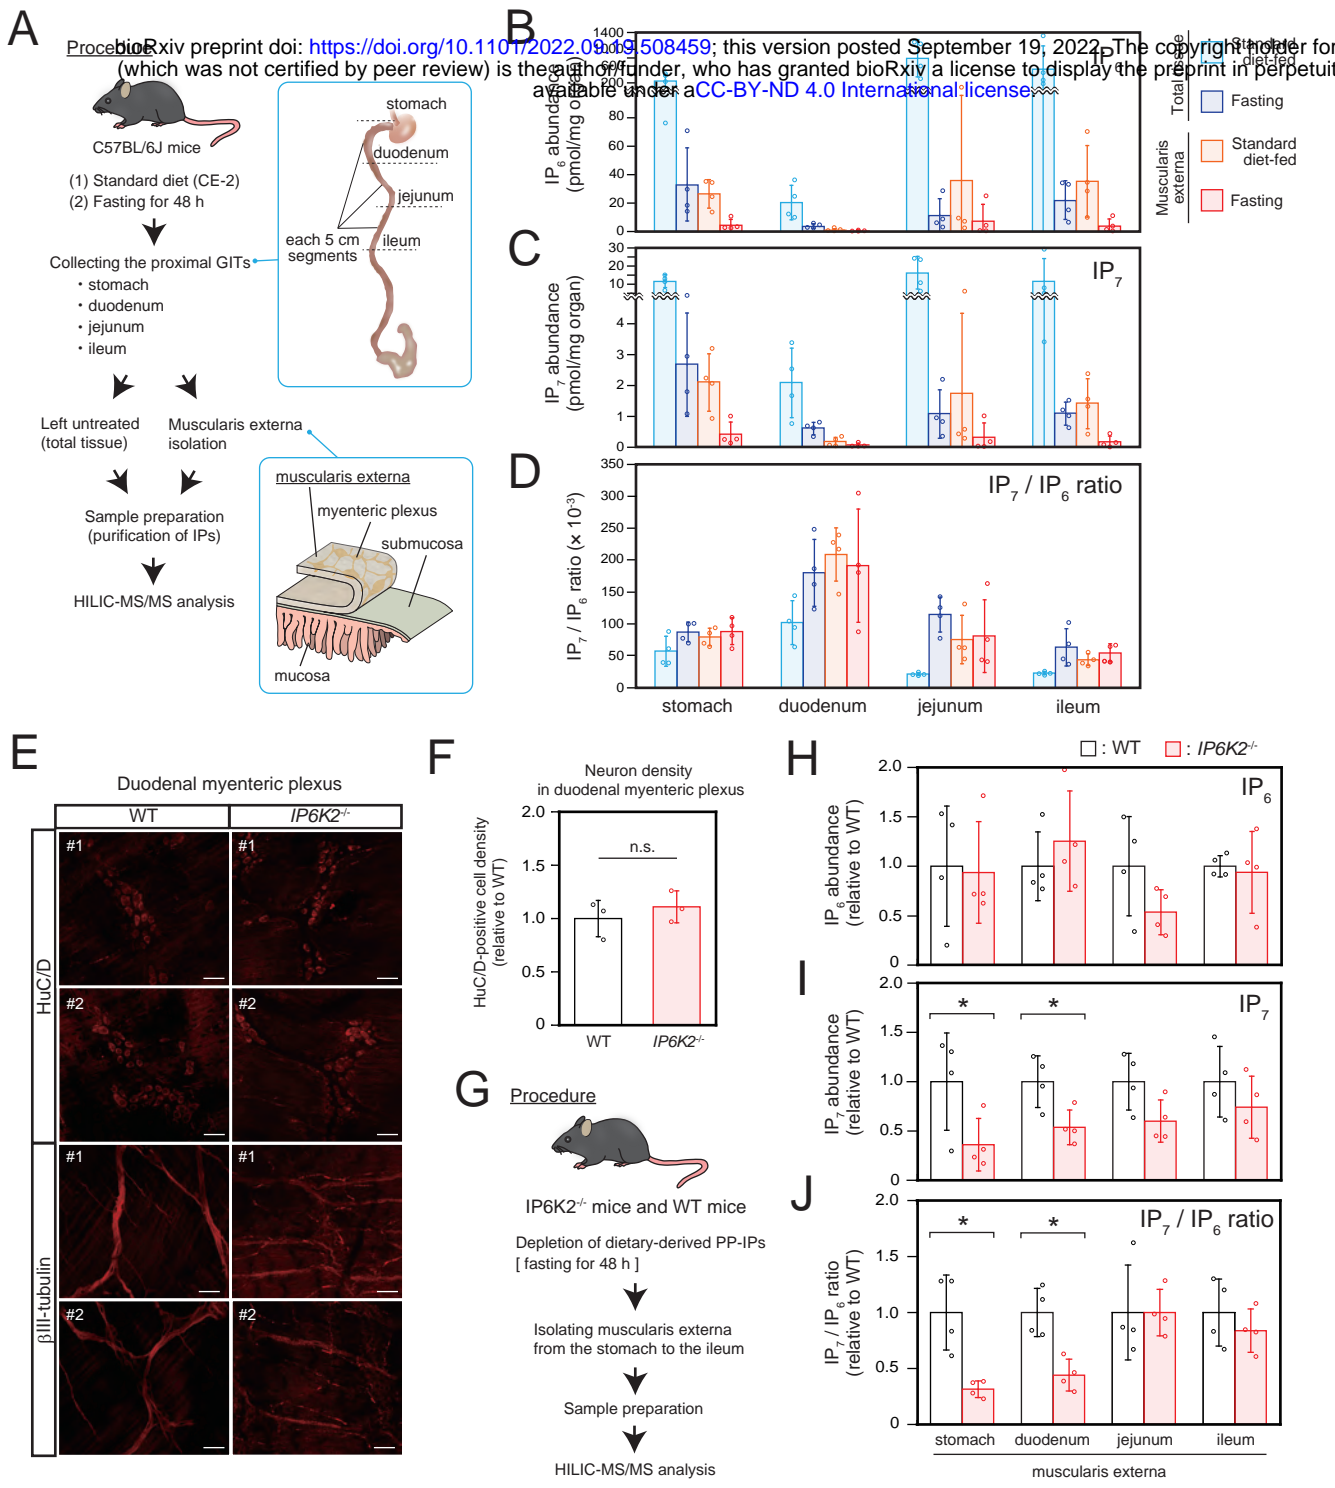

Fig 6. Ito et al.

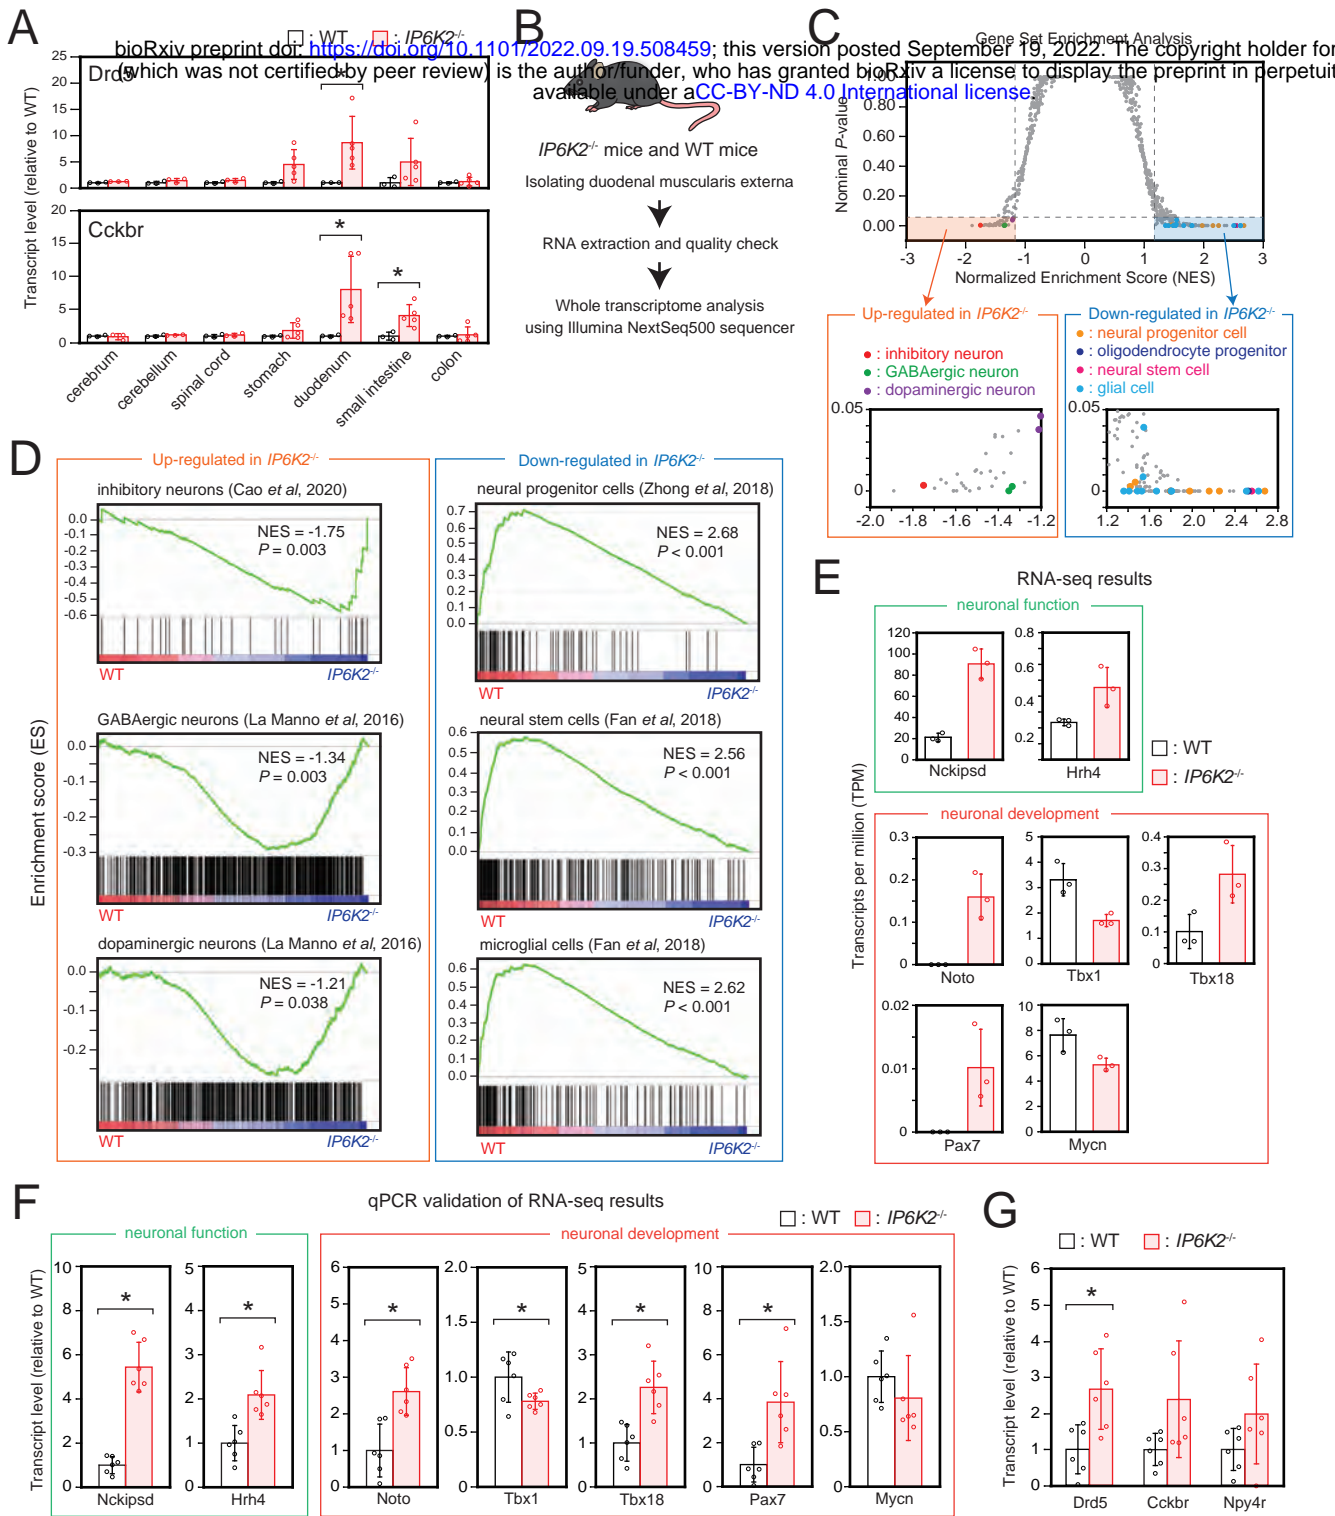

Fig 7. Ito et al.
